# Supplementary material for: Striatin 3 and MAP4K4 cooperate towards oncogenic growth and tissue invasion in medulloblastoma
Source: bioRxiv or medRxiv preprint supplement (doi:10.1101/2021.05.07.442906), 2022-03-07

1 **Supplementary materials**

2 **Table 1:** Antibodies used in this study

| <b>Antibodies</b>                                         |                             |                   |                                    |
|-----------------------------------------------------------|-----------------------------|-------------------|------------------------------------|
| <b>Ab name</b>                                            | <b>Company</b>              | <b>Identifier</b> | <b>Dilution</b>                    |
| Anti-β-tubulin                                            | Sigma Aldrich               | T5201             | 1:1000 (IB)                        |
| Anti-GAPDH (14C10)                                        | Cell signaling technologies | 2118s             | 1:2000 (IB)                        |
| Anti-FLAG® M2                                             | Sigma Aldrich               | F1804             | 1:1500 (IB)<br>3 µg/mg lysate (IP) |
| Streptavidin-HRP                                          | Jackson Immunoresearch      | 16-030-084        | 1:500 (IB)                         |
| Anti-MAP4K4                                               | Abcam                       | ab80418           | 1:2000 (IB)                        |
| Anti-STRN4                                                | Abcam                       | ab194948          | 1:2000 (IB)                        |
| Anti-STRN3 (S68)                                          | Thermo Fisher Scientific    | MA1-46461         | 1:2000 (IB)                        |
| Anti-STRIP1                                               | Abcam                       | ab199851          | 1:2000 (IB)                        |
| Anti-VASP (9A2)                                           | Cell signaling technologies | 3132              | 1:1000 (IB)<br>1: 400 (IFA)        |
| Anti-phospho-VASP (Ser157)                                | Abcam                       | ab47268           | 1:750 (IB)                         |
| Anti-mouse HRP linked                                     | Cell signaling technologies | 7076              | 1:5000 (IB)                        |
| Anti-rabbit HRP linked                                    | Cell signaling technologies | 7074              | 1:5000 (IB)                        |
| easyBlot anti-mouse HRP                                   | GeneTex                     | GTX221667-01      | 1:1000 (IB)                        |
| Anti-BioID2                                               | Novus                       | NBP2-59940        | 1:200 (IFA)                        |
| Streptavidin Alexa Fluor 594 conjugate                    | Invitrogen                  | S11227            | 1:500 (IFA)                        |
| Anti-Calbindin                                            | Abcam                       | ab108404          | 1:1000 (IFA)                       |
| Anti-GFAP                                                 | Abcam                       | ab53554           | 1:250 (IFA)                        |
| Anti-human nuclei (3E1.3)                                 | Millipore                   | MAB4383           | 1:250 (IFA)                        |
| Donkey anti-Mouse IgG Secondary Antibody, Alexa Fluor 488 | Thermo Fisher Scientific    | A32766            | 1:400 (IFA)                        |

|                                                         |                          |             |             |
|---------------------------------------------------------|--------------------------|-------------|-------------|
| Cy3-conjugated Donkey anti-Rabbit IgG                   | Jackson ImmunoResearch   | 711-165-152 | 1:250 (IFA) |
| Brilliant Violet 421 Donkey Anti-Goat IgG               | Jackson ImmunoResearch   | 705-675-147 | 1:100 (IFA) |
| Goat anti-Mouse IgG Secondary Antibody, Alexa Fluor 405 | Thermo Fisher Scientific | A31553      | 1:200 (IFA) |
| Hoechst                                                 | Sigma Aldrich            | B2883       | 1:2000      |

3

4 **Table 2:** Sequence information for sgRNAs used in this study

| <b>sgRNA Oligonucleotides</b> |             |                        |
|-------------------------------|-------------|------------------------|
| <b>Name</b>                   | <b>Exon</b> | <b>Target sequence</b> |
| sgCTRL                        | -           | GTAGCGAACGTGTCCGGCC    |
| sgSTRN4#1                     | Exon 1      | GCTCAGGTGGCCTTCCTTCA   |
| sgSTRN4#2                     | Exon 2      | TTCCTTCAGGGAGAGAGGAA   |
| sgSTRN3#1                     | Exon 2      | AGGTCAAGAGAACCTGAAGA   |
| sgSTRN3#2                     | Exon 2      | AGTATGCATTAAAACAAGAA   |
| sgSTRIP1#1                    | Exon 4      | TGCCAGGGAGAAGAGACTCA   |
| sgSTRIP1#2                    | Exon 4      | GGATGGCTTGGAAGTCACTG   |
| sgMAP4K4#1                    | Exon 7      | GGCGGAGAAATACGTTTCAT   |
| sgMAP4K4#2                    | Exon 4      | CAGGACATGATGACCAACTC   |

5

6 **Table 3:** siRNA sequences used in this study

| <b>siRNA</b> |                        |                |                   |
|--------------|------------------------|----------------|-------------------|
| <b>Name</b>  | <b>Target sequence</b> | <b>Company</b> | <b>Identifier</b> |
| siCTRL       | UAAGGCUAUGAAGAGAUAC    | Dharmacon      | D-001210-02-05    |
| siSTRN4      | GGAUCAAGAUGCUGAGAGUA   | Dharmacon      | D-020389-01-0002  |
| siSTRN3      | GGAGGAGGCAAGUCAUUUA    | Dharmacon      | D-019145-01-0002  |
| siSTRIP1     | GCAGCAAUUUAUAGGUUA     | Dharmacon      | D-021516-01-0002  |

|          |                      |           |                  |
|----------|----------------------|-----------|------------------|
| siMAP4K4 | UAAGUUACGUGUCUACUUAU | Dharmacon | D-003971-05-0002 |
|----------|----------------------|-----------|------------------|

7

8 **Table 4:** Custom qPCR primers used in this study

| <b>qPCR primers</b> |   |                         |                     |
|---------------------|---|-------------------------|---------------------|
| <b>Target genes</b> |   | <b>Sequence</b>         | <b>Product size</b> |
| 18s                 | F | GGATGTAAAGGATGGAAAATACA | 23 bp               |
|                     | R | TCCAGGTCTTCACGGAGCTTGTT |                     |
| MAP4K4              | F | GTTACACTAATGCGCACCAC    | 193 bp              |
|                     | R | GTACTTGCCACCAGTCTGCT    |                     |
| STRN4               | F | CTCAGGTGGCCTTCCTTCAG    | 20 bp               |
|                     | R | TTTGGCCCTTTCCTGCTTCA    |                     |
| STRN3               | F | TGGCACAGAATGGGCTGAAC    | 101 bp              |
|                     | R | CTCCAAGGCCAGTACACTT     |                     |
| STRIP1              | F | CGCAAAGACTCAGAGGGCTA    | 109 bp              |
|                     | R | GCCCTTCCGTGTAGCTGTAA    |                     |
| CTGF                | F | CACCCGGGTTACCAATGACA    | 119 bp              |
|                     | R | GGATGCACTTTTTGCCCTTCTTA |                     |
| CYR61               | F | ACAGCAGCCTGAAAAAGGGC    | 104 bp              |
|                     | R | GGGCCGGTATTTCTTCACACT   |                     |
| ANKRD1              | F | TAGCGCCCGAGATAAGTTGC    | 97 bp               |
|                     | R | GTCTGCCTCACAGGCGATAA    |                     |

9

10

## 11 Supplementary figures

12 **Figure S1: BioID identified MAP4K4 interactome.** (a) Schematic diagram of BioID technology and  
13 schematic representation of the lentiviral vectors used to generate 3xFLAG-tagged MAP4K4-BioID2 cell  
14 lines. Biotin ligase (BioID2) was fused to either the N-terminus (FLAG-BioID2-MAP4K4) or C-terminus  
15 (MAP4K4-BioID2-FLAG) of MAP4K4. An extended flexible linker consisting of 13 repeats of GGGGS  
16 was inserted between the coding regions of MAP4K4 and BioID2. As negative control, BioID2-FLAG  
17 was used (adapted from<sup>82</sup>). (b) Confocal microscopy images of DAOY cells expressing BioID2-MAP4K4  
18 fusion protein or BioID2 alone. Biotinylated proteins were labeled with streptavidin (red) and  
19 predominantly co-localized with BioID2 (green). Considerable biotinylation is observed in biotin (50  $\mu$ M)  
20 supplemented cells expressing BioID2. DNA is labeled with Hoechst (blue). Scale bar: 30  $\mu$ m. (c)  
21 Volcano plot of protein interactions identified by streptavidin affinity purification-MS in N-BioID2-  
22 MAP4K4 (top) or C-BioID2-MAP4K4 (lower) DAOY cells compared to BioID2-CTRL. The logarithmic  
23 ratios of protein intensities are plotted against negative logarithmic p-values of Student's *t*-test.  $n=2$ .  
24 Proteins significantly enriched ( $p < 0.05$  and  $> 2$ -fold enrichment) in BioID2-MAP4K4 cells compared  
25 to BioID2-CTRL are indicated in red. Members of the STRIPAK complex are highlighted. (d) DAOY cells  
26 expressing BioID2-MAP4K4 fusion protein were serum-starved overnight and treated with 1  $\mu$ M GNE-  
27 495 for 16 h where indicated. FLAG-immunoprecipitated MAP4K4 was subjected to immunoblot analysis  
28 for STRIPAK components. GAPDH was used as loading control.

29  
30 **Figure S2: STRIPAK complex members are highly expressed in MB patients.** (a, b) mRNA (a) and  
31 protein (b) levels of STRN4, STRN3, and STRIP1 in a cohort of 218 pediatric brain tumor samples  
32 representing seven histological types, including medulloblastoma (MB,  $n=22$ ), low-grade glioma (LGG,  
33  $n=93$ ), high-grade glioma (HGG,  $n=25$ ), ependymoma (EP,  $n=32$ ), craniopharyngioma (CP,  $n=18$ ),  
34 ganglioglioma (GG,  $n=18$ ), and atypical teratoid rhabdoid tumor (ATRT,  $n=12$ ). The graphs represent  
35 the Z-score values for protein and mRNA in each group. \*  $p < 0.05$ , \*\*  $p < 0.01$ , \*\*\*  $p < 0.001$ , \*\*\*\*  $p <$   
36  $0.0001$  (one-way ANOVA). (c) Heatmap for protein or phosphoprotein levels of the indicated proteins in  
37 the same cohort of patients as in a. (d) Scatterplot showing the phospho-abundance of the indicated  
38 residues of MAP4K4 versus the protein expression levels of STRN4, STRN3, or STRIP1 in MB samples.  
39 The data were obtained from the CPTAC data portal (<http://pbt.cptac-data-view.org/>).

40  
41 **Figure S3: CRISPR/Cas9 and siRNA-mediated downregulation of MAP4K4 and STRIPAK complex**  
42 **members.** (a, b) Immunoblots showing CRISPR/Cas9-mediated depletion of MAP4K4, STRN4,  
43 STRN3, or STRIP1 in DAOY (a) or HD-MBO3 (b) cells. The numbers indicate the sgRNA used for each  
44 gene. (c) Spheroid invasion assay (SIA) of DAOY cells with CRISPR/Cas9-mediated knockout of  
45 MAP4K4, STRN4, STRN3, or STRIP1 with or without stimulation with EGF (30 ng/ml).  $n=3$ , means  $\pm$   
46 SD. (d) qRT-PCR analysis of MAP4K4, STRN4, STRN3, and STRIP1 in DAOY cells 72 h after  
47 transfection with the indicated single siRNA or siRNA combination.  $n=3$ , means  $\pm$  SD. (e) Immunoblot  
48 analysis of MAP4K4 and STRIPAK members in DAOY cells 72 h after siRNA transfection. (f) SIA of  
49 DAOY cells stimulated with 30 ng/ml EGF and treated with different concentrations of LB-100.  $n=3$ ,  
50 means  $\pm$  SD. (g) CellTox Green viability analysis of DAOY spheroids treated for 24, 48, and 72 h with  
51 increasing concentrations of LB-100.  $n=3$ , means  $\pm$  SD. \*  $p < 0.05$ , \*\*  $p < 0.01$ , \*\*\*  $p < 0.001$ , \*\*\*\*  $p <$   
52  $0.0001$  (one-way ANOVA).

53  
54 **Figure S4: High-resolution images of organotypic cerebellum slice culture implanted with DAOY**  
55 **spheroids.** Confocal microscopy analysis of OCSCs co-cultured with siRNA-transfected DAOY tumor  
56 cell spheroids 72 h after transfection. 63x image acquisition of representative slices 48 h after  
57 implantation without GF treatment. Green: Lifeact-EGFP; blue: calbindin (Purkinje cells); red: GFAP;  
58 yellow: Edu-Click-IT. Scale bar: 50  $\mu$ m.

59  
60  
61 **Figure S5: High-resolution images of organotypic cerebellum slice culture implanted with HD-**  
62 **MBO3 spheroids.** Single confocal microscopy sections of OCSCs implanted with tumor spheroids  
63 derived from HD-MBO3 with CRISPR/Cas9-mediated knockout of MAP4K4, STRN3, or STRIP1. 63x  
64 image acquisition of slices five days after implantation and treatment with 12.5 ng/ml bFGF. 4x  
65 magnifications of boxed areas are shown. Green: Lifeact-EGFP; blue: calbindin (Purkinje cells); red:  
66 human nuclei; yellow: Edu-Click-IT. Scale bar: 200  $\mu$ m.

67



68 **Figure S6: Models for MAP4K4 and STRIPAK regulation of YAP/TAZ target gene expression.**  
69 MAP4K4 promotes LATS1/2-mediated activation of the Hippo pathway, causing YAP degradation<sup>37</sup>.  
70 STRIPAK enables PP2A-mediated dephosphorylation of MAP4K4 and therefore acts as a negative  
71 regulator of the Hippo pathway, activating a YAP transcriptional program and ultimately promoting cell  
72 proliferation.

73  
74 **Figure S7: Phylogenetic distribution of the kinases predicted the peptide chip array. (a)** Upstream  
75 kinase prediction analysis of DAOY cells transfected with the indicated siRNA ± treatment with 100 ng/ml  
76 bFGF. The plots show the top differentially activated putative upstream tyrosine kinases (PTK) predicted  
77 to phosphorylate the phosphosites on the PamChip®. The x-axis indicates the values for the mean  
78 kinase statistic, which represents the difference in the activity of the predicted protein kinase between  
79 the two compared groups, with effect size (values) and direction (>0=activation; <0=inhibition). The color  
80 of the bars represents the specificity score (darker the color, higher the specificity). Values of the  
81 specificity score >0.9 were considered as statistically relevant. First graph from left: comparison of bFGF  
82 stimulated siCTRL cells vs. untreated (UT); all other graphs: comparison of the indicated siTarget vs.  
83 siCTRL in the presence of bFGF. *n*=3. **(b-e)** Phylogenetic kinome trees illustrating the family distribution  
84 of the upstream kinases predicted to phosphorylate the serine/threonine (STK) and protein tyrosine  
85 (PTK) consensus peptides of the PamChip®. Colored dots highlight the kinases where predicted activity  
86 is significantly different in the indicated siTarget **(b: siMAP4K4; c: siSTRN4; d: siSTRN3, e: siSTRIP1)**  
87 compared to siCTRL in bFGF stimulated conditions in DAOY cells. The coloring scale is based on the  
88 mean kinase statistic and ranges from -2 (strong decrease of kinase activity in siTarget vs. siCTRL, red  
89 color) to +2 (strong increase of kinase activity in siTarget vs. siCTRL, green color). The size of the circle  
90 represents the specificity score.

91  
92 **Figure S8: Volcano plots of peptide chip arrays. (a, b)** Individual volcano plots representing the  
93 changes in phosphorylation of phospho-serine/threonine (STK, **a**) and phospho-tyrosine (PTK, **b**)  
94 peptides in the indicated siTarget versus siCTRL in untreated (UT, top) or bFGF (lower) stimulated  
95 conditions in DAOY cells. The peptides that showed significant changes in phosphorylation are  
96 highlighted in red ( $p < 0.05$ ) or orange ( $p < 0.1$ ). The *p*-values were calculated versus siCTRL by ANOVA  
97 and post-hoc Dunnett's test in the BioNavigator software. *n*=3.

98



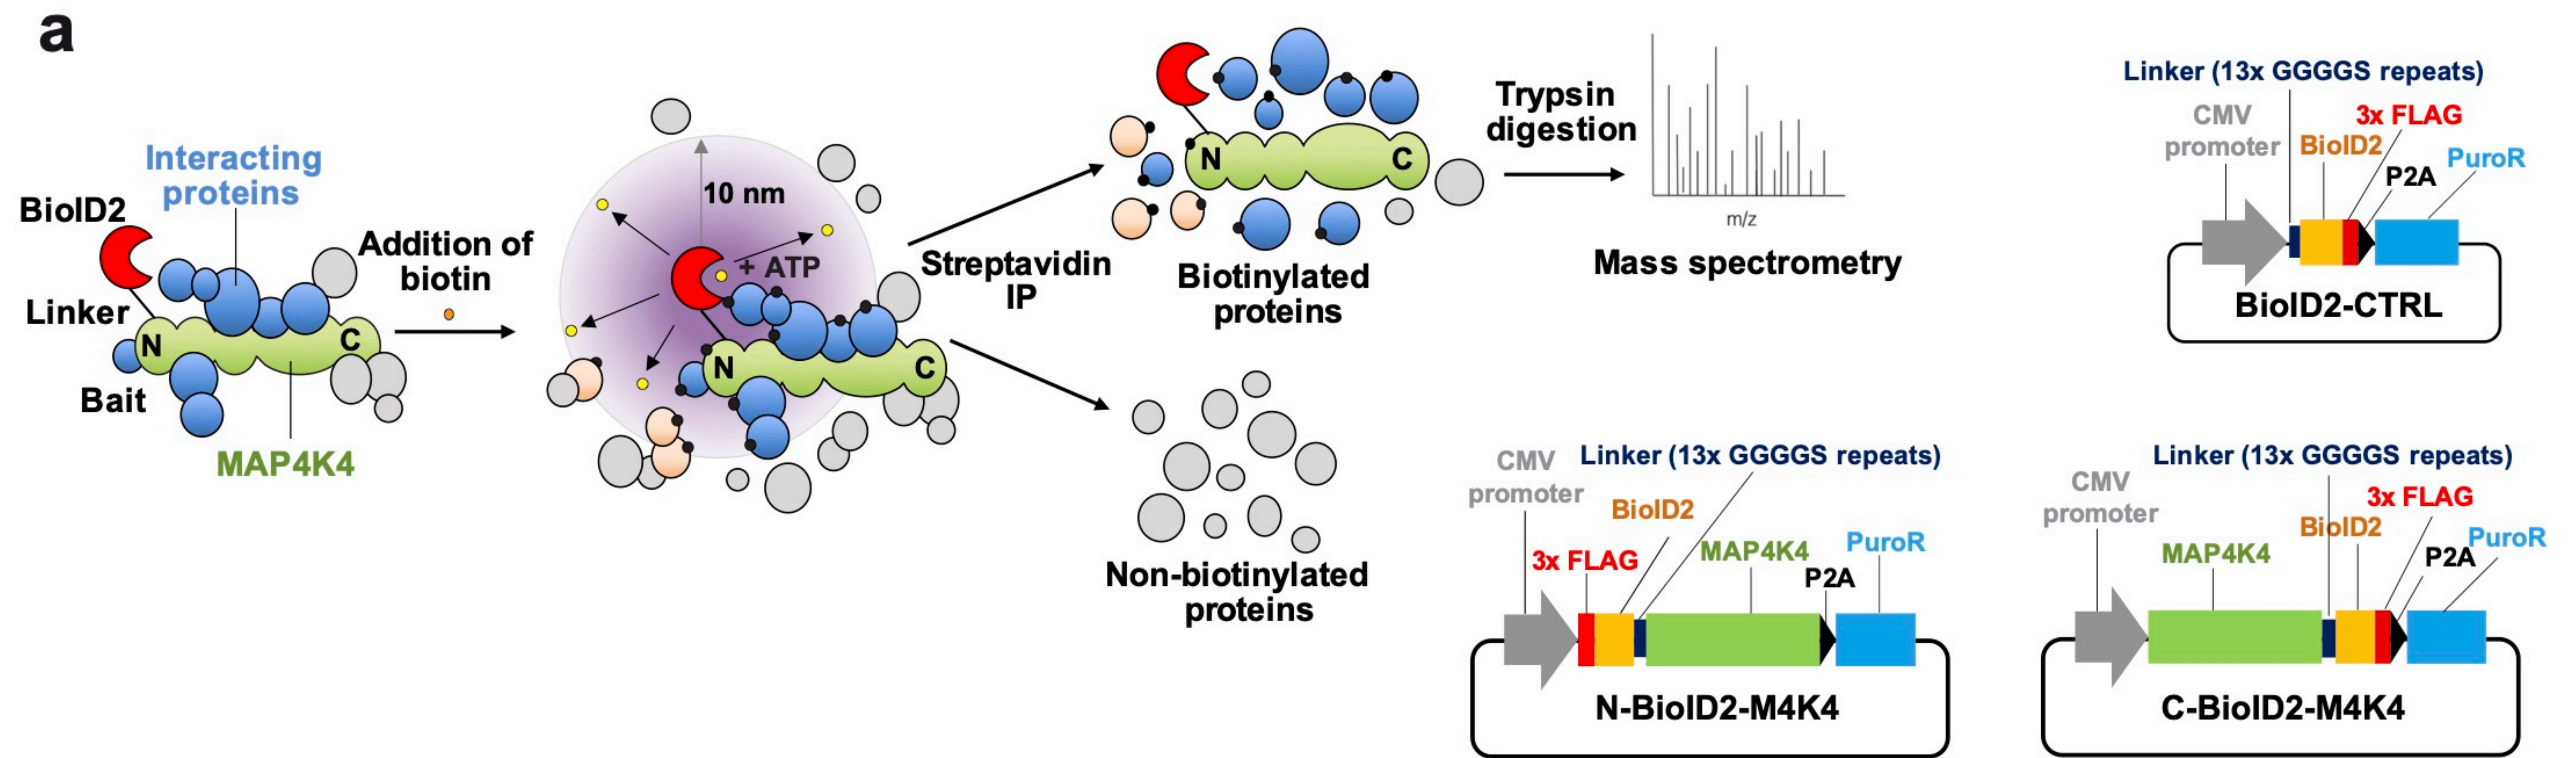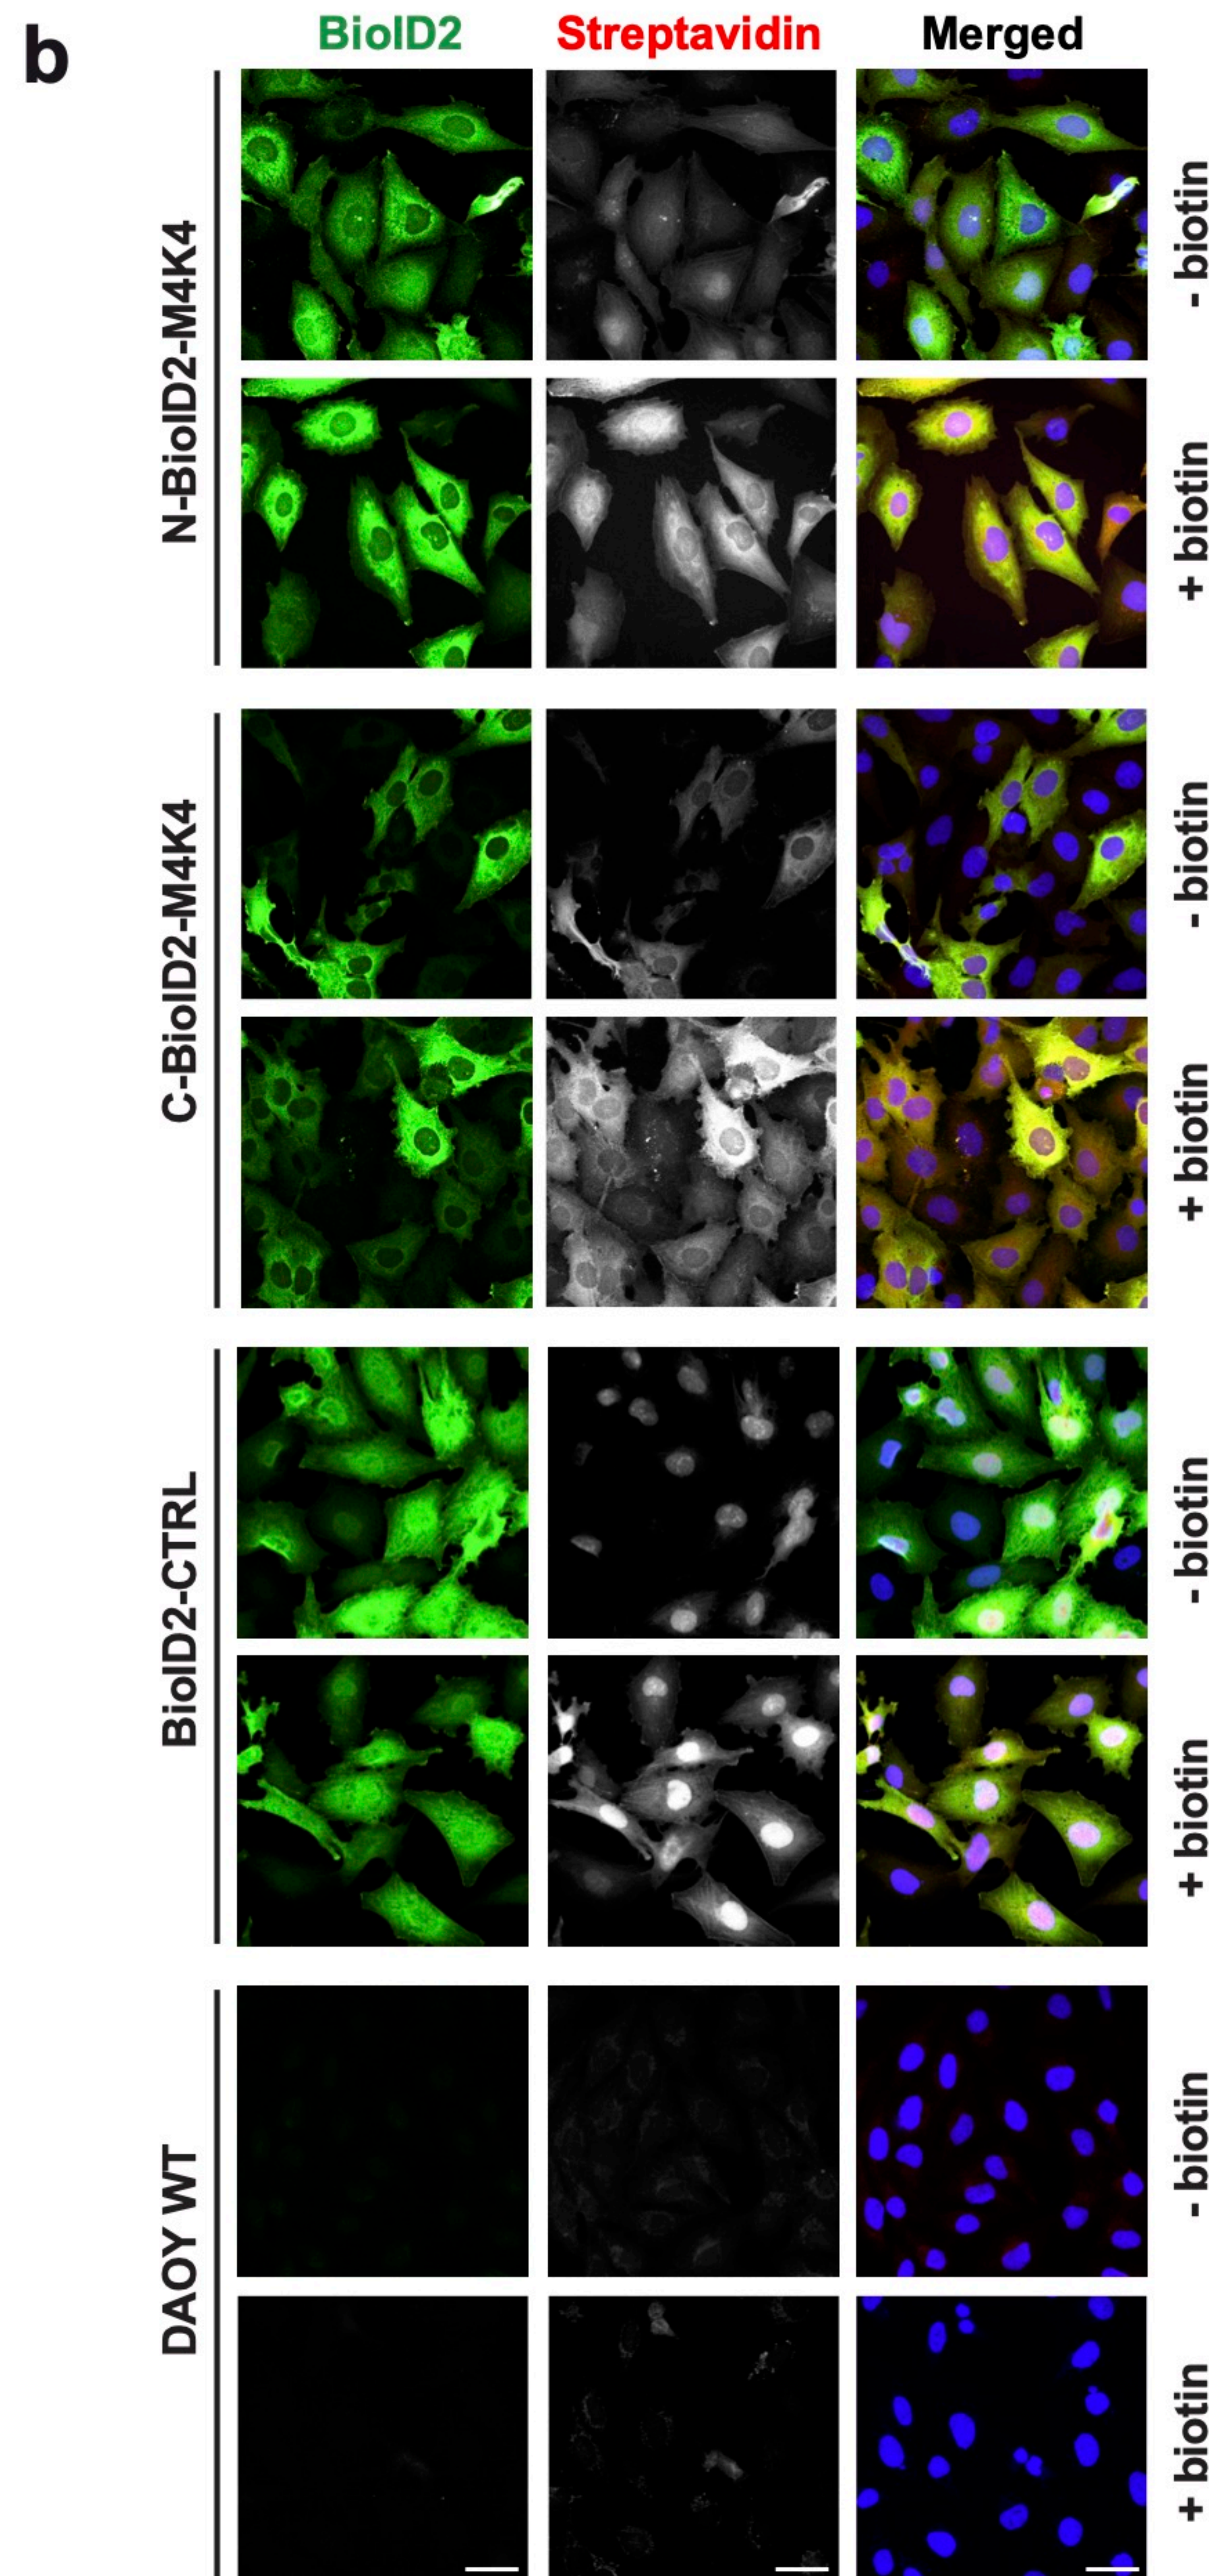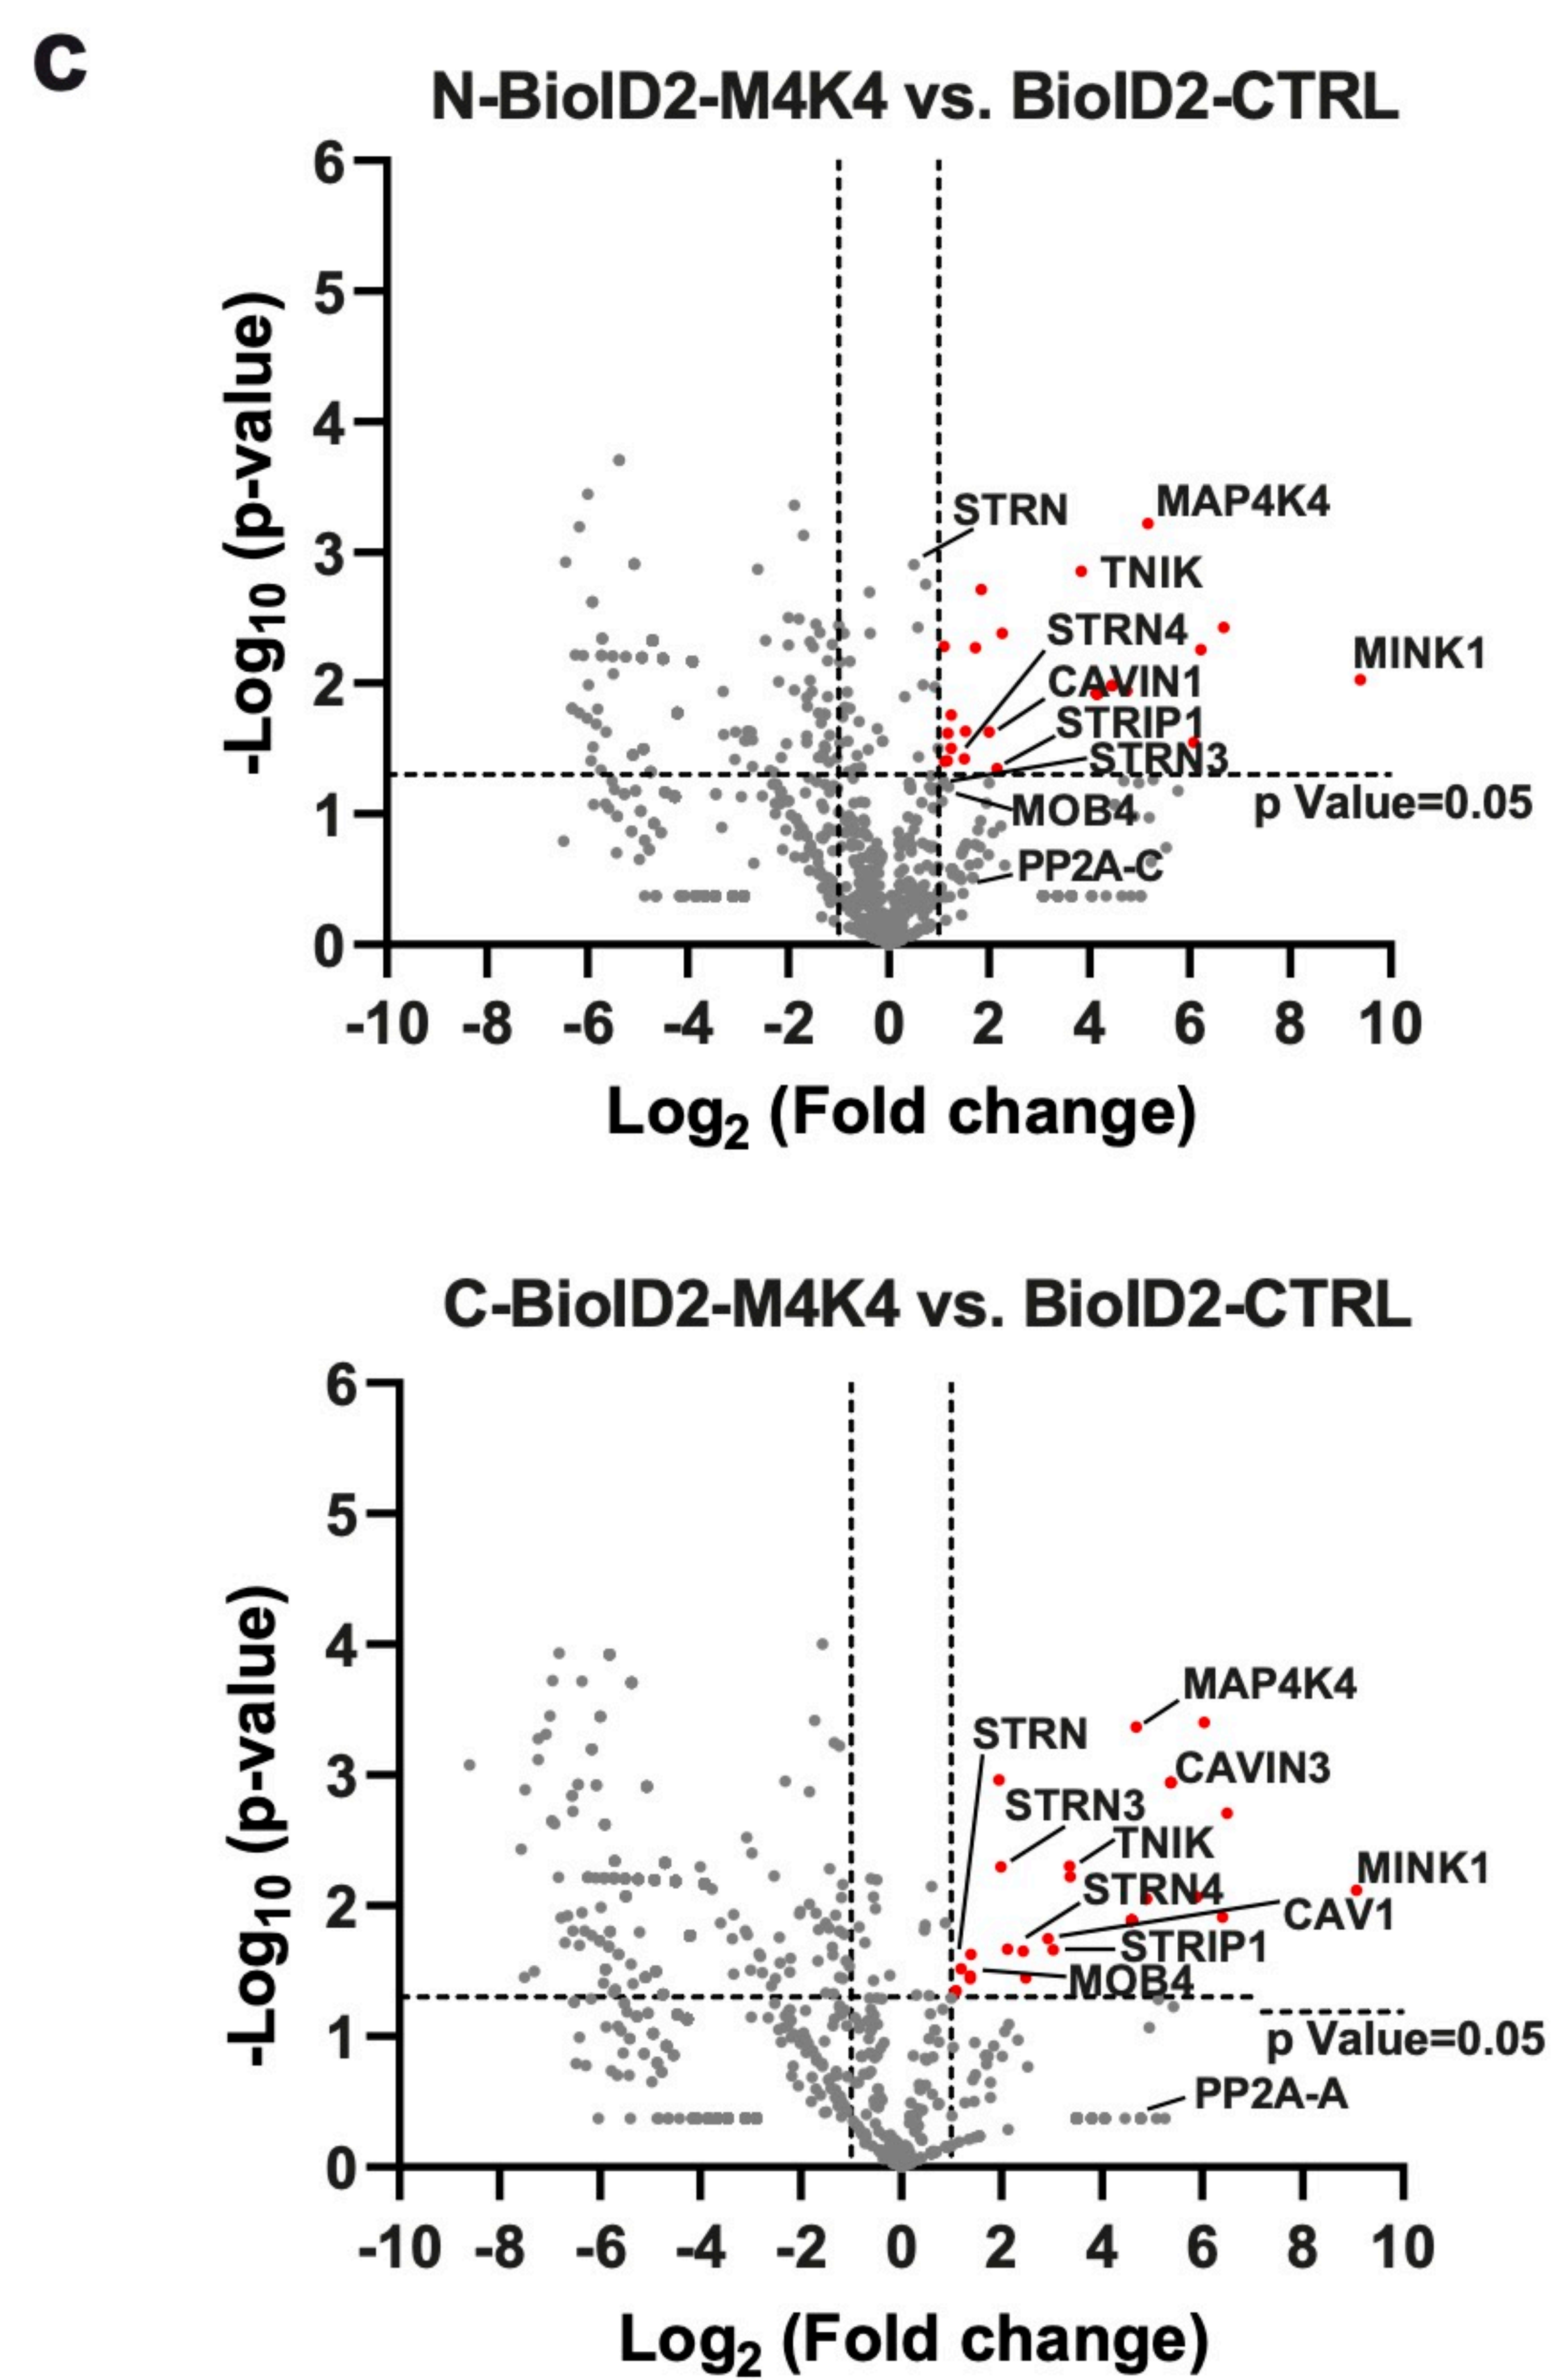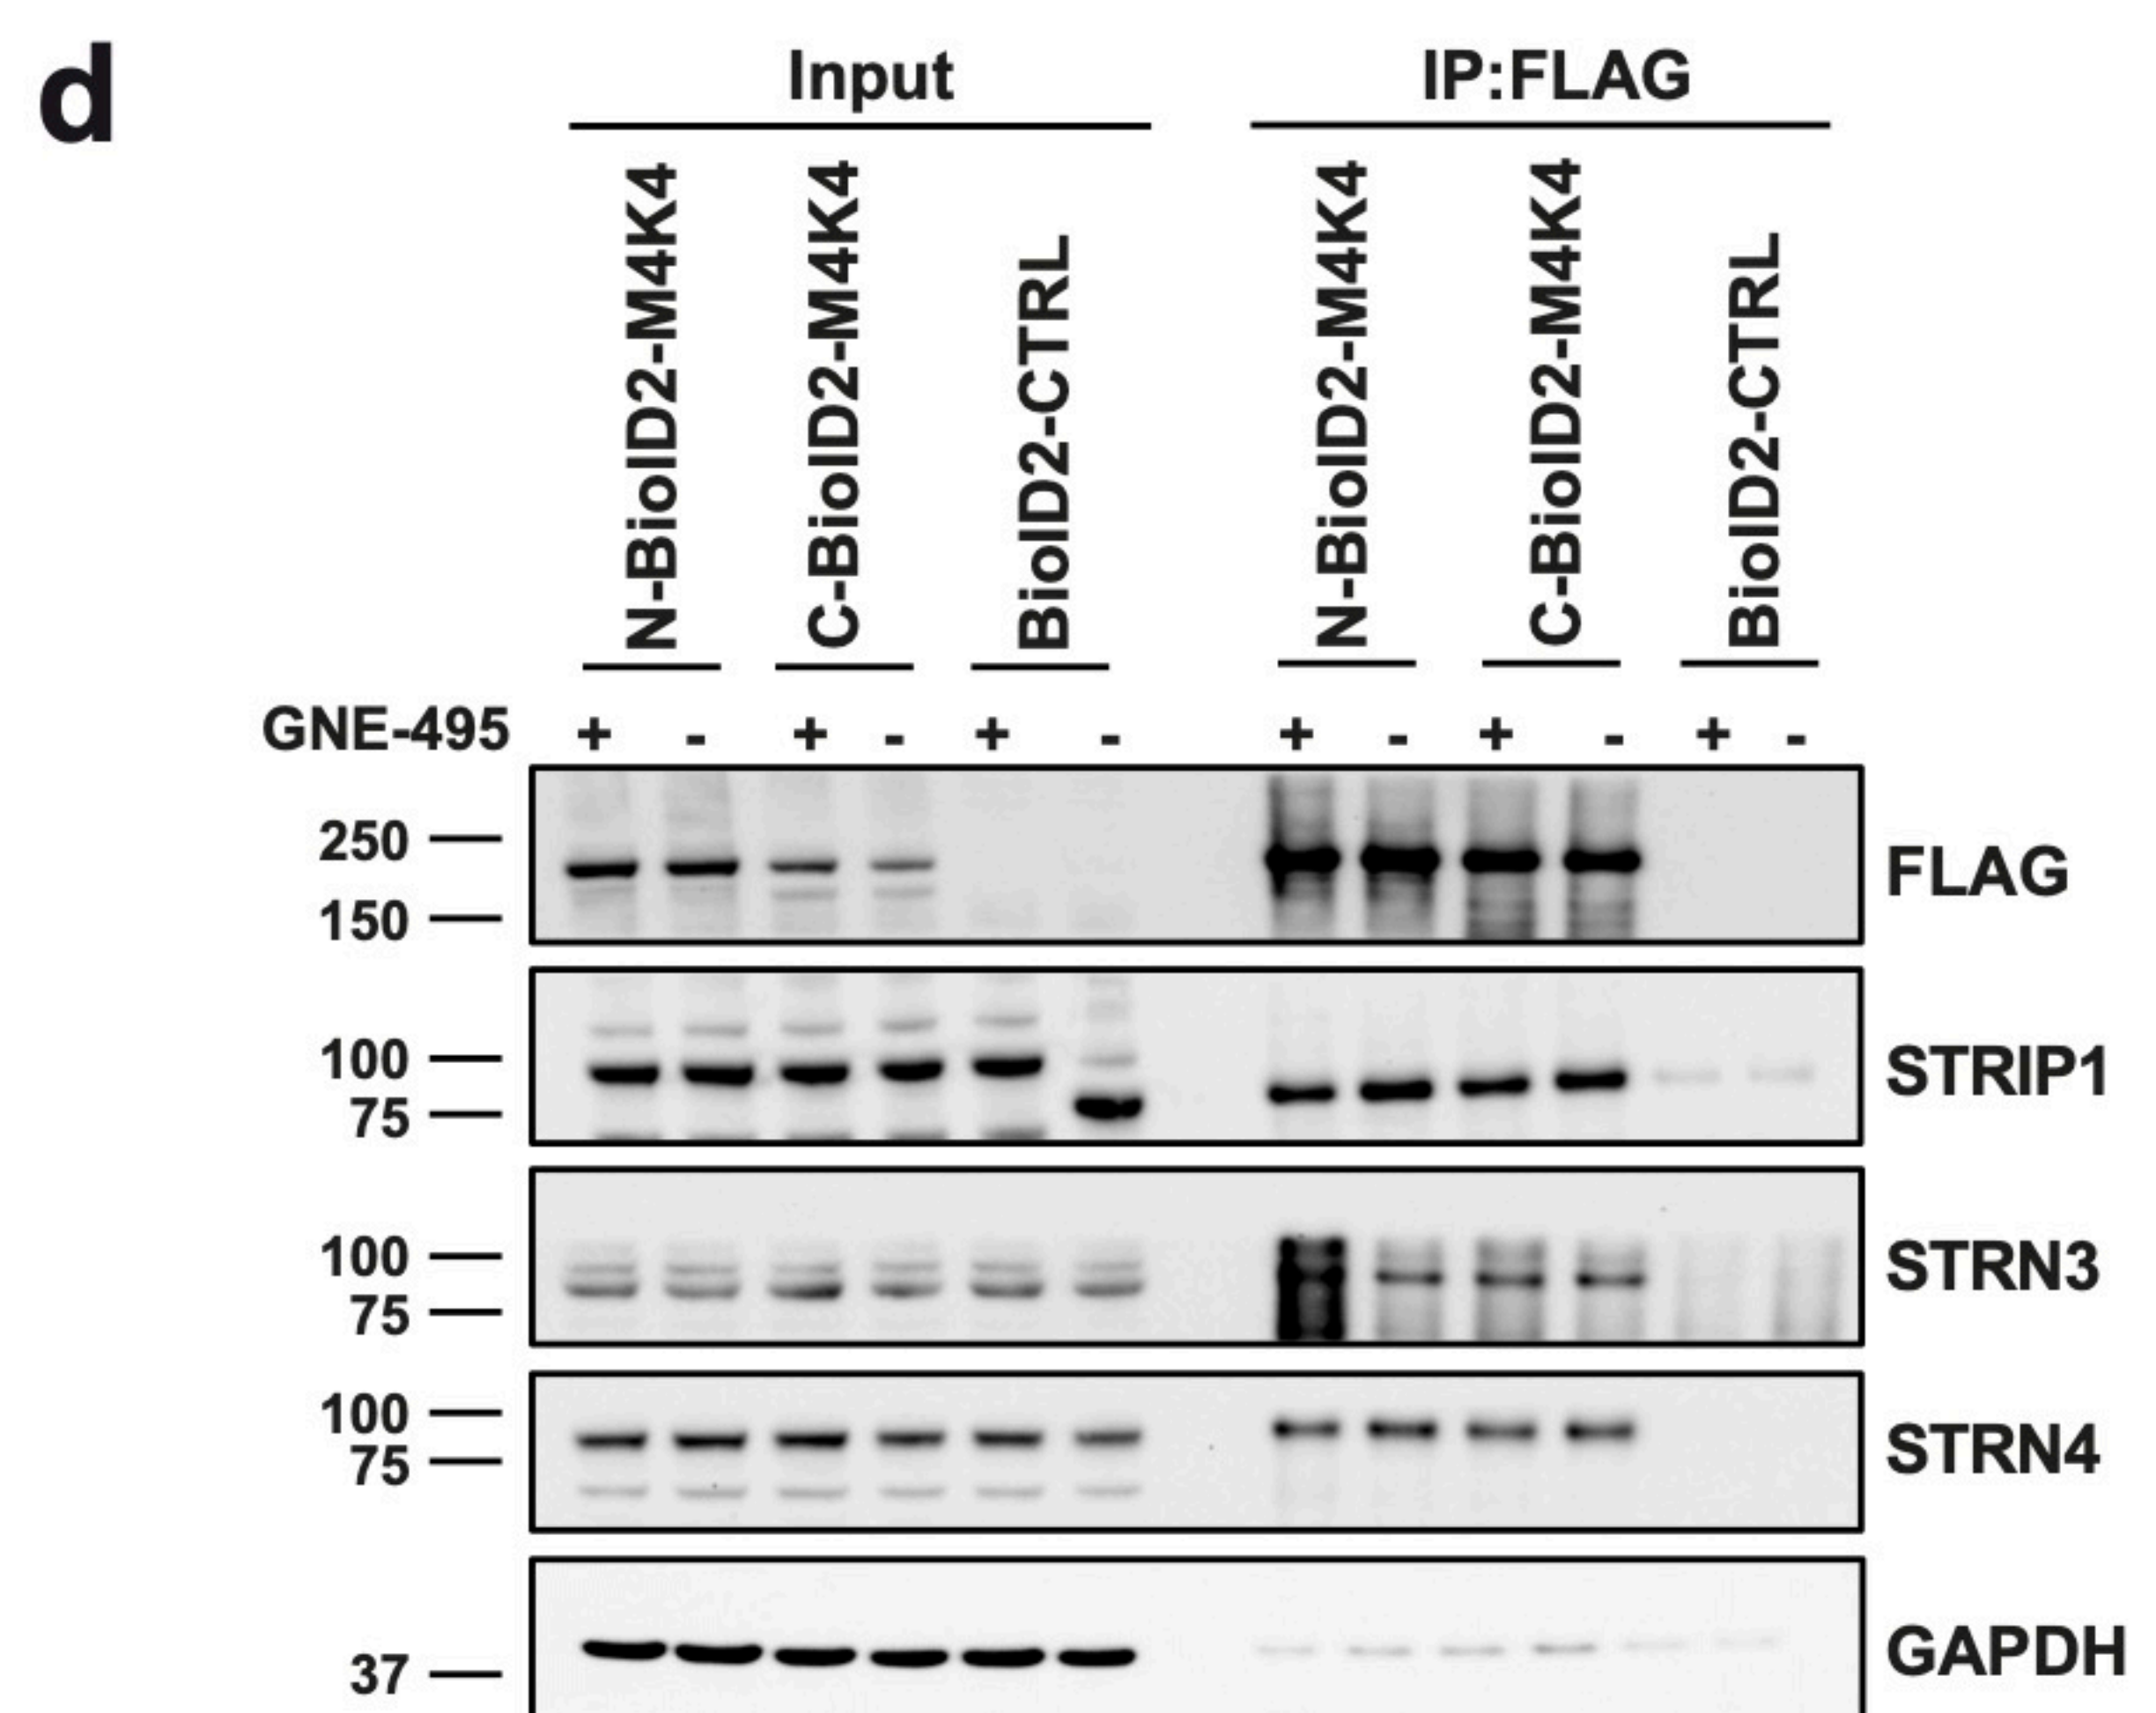



Figure S2

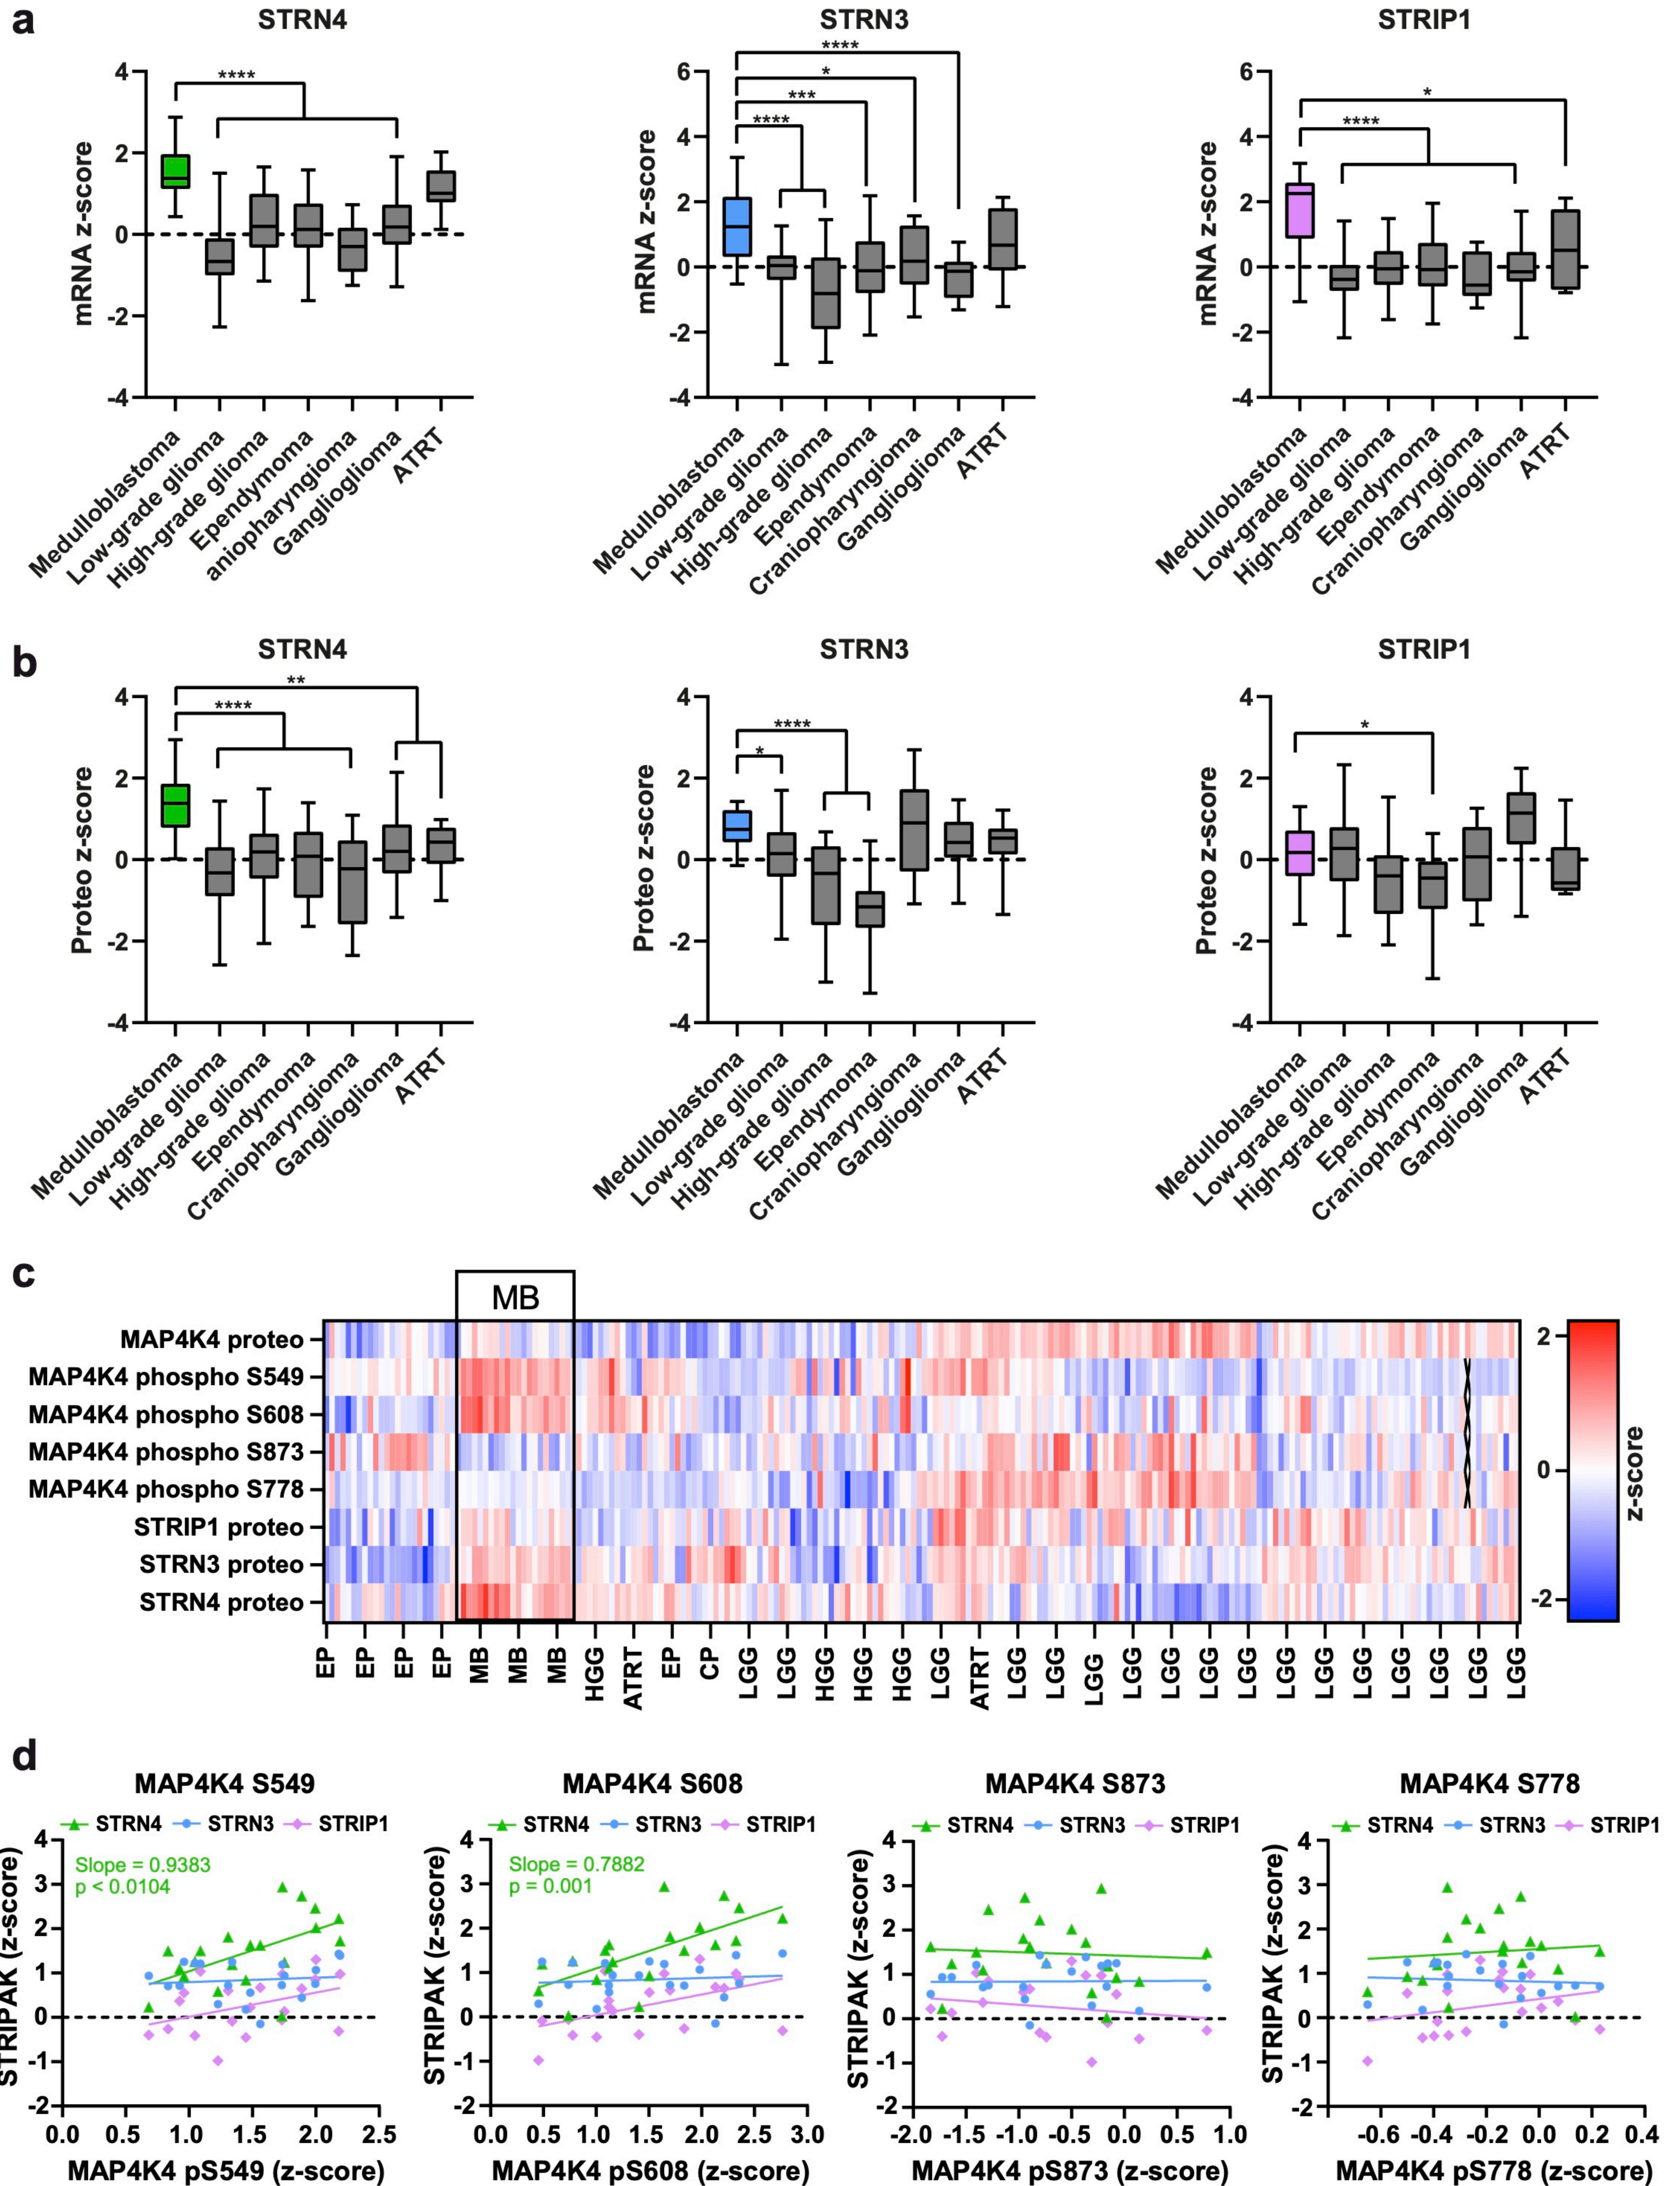



Figure S3

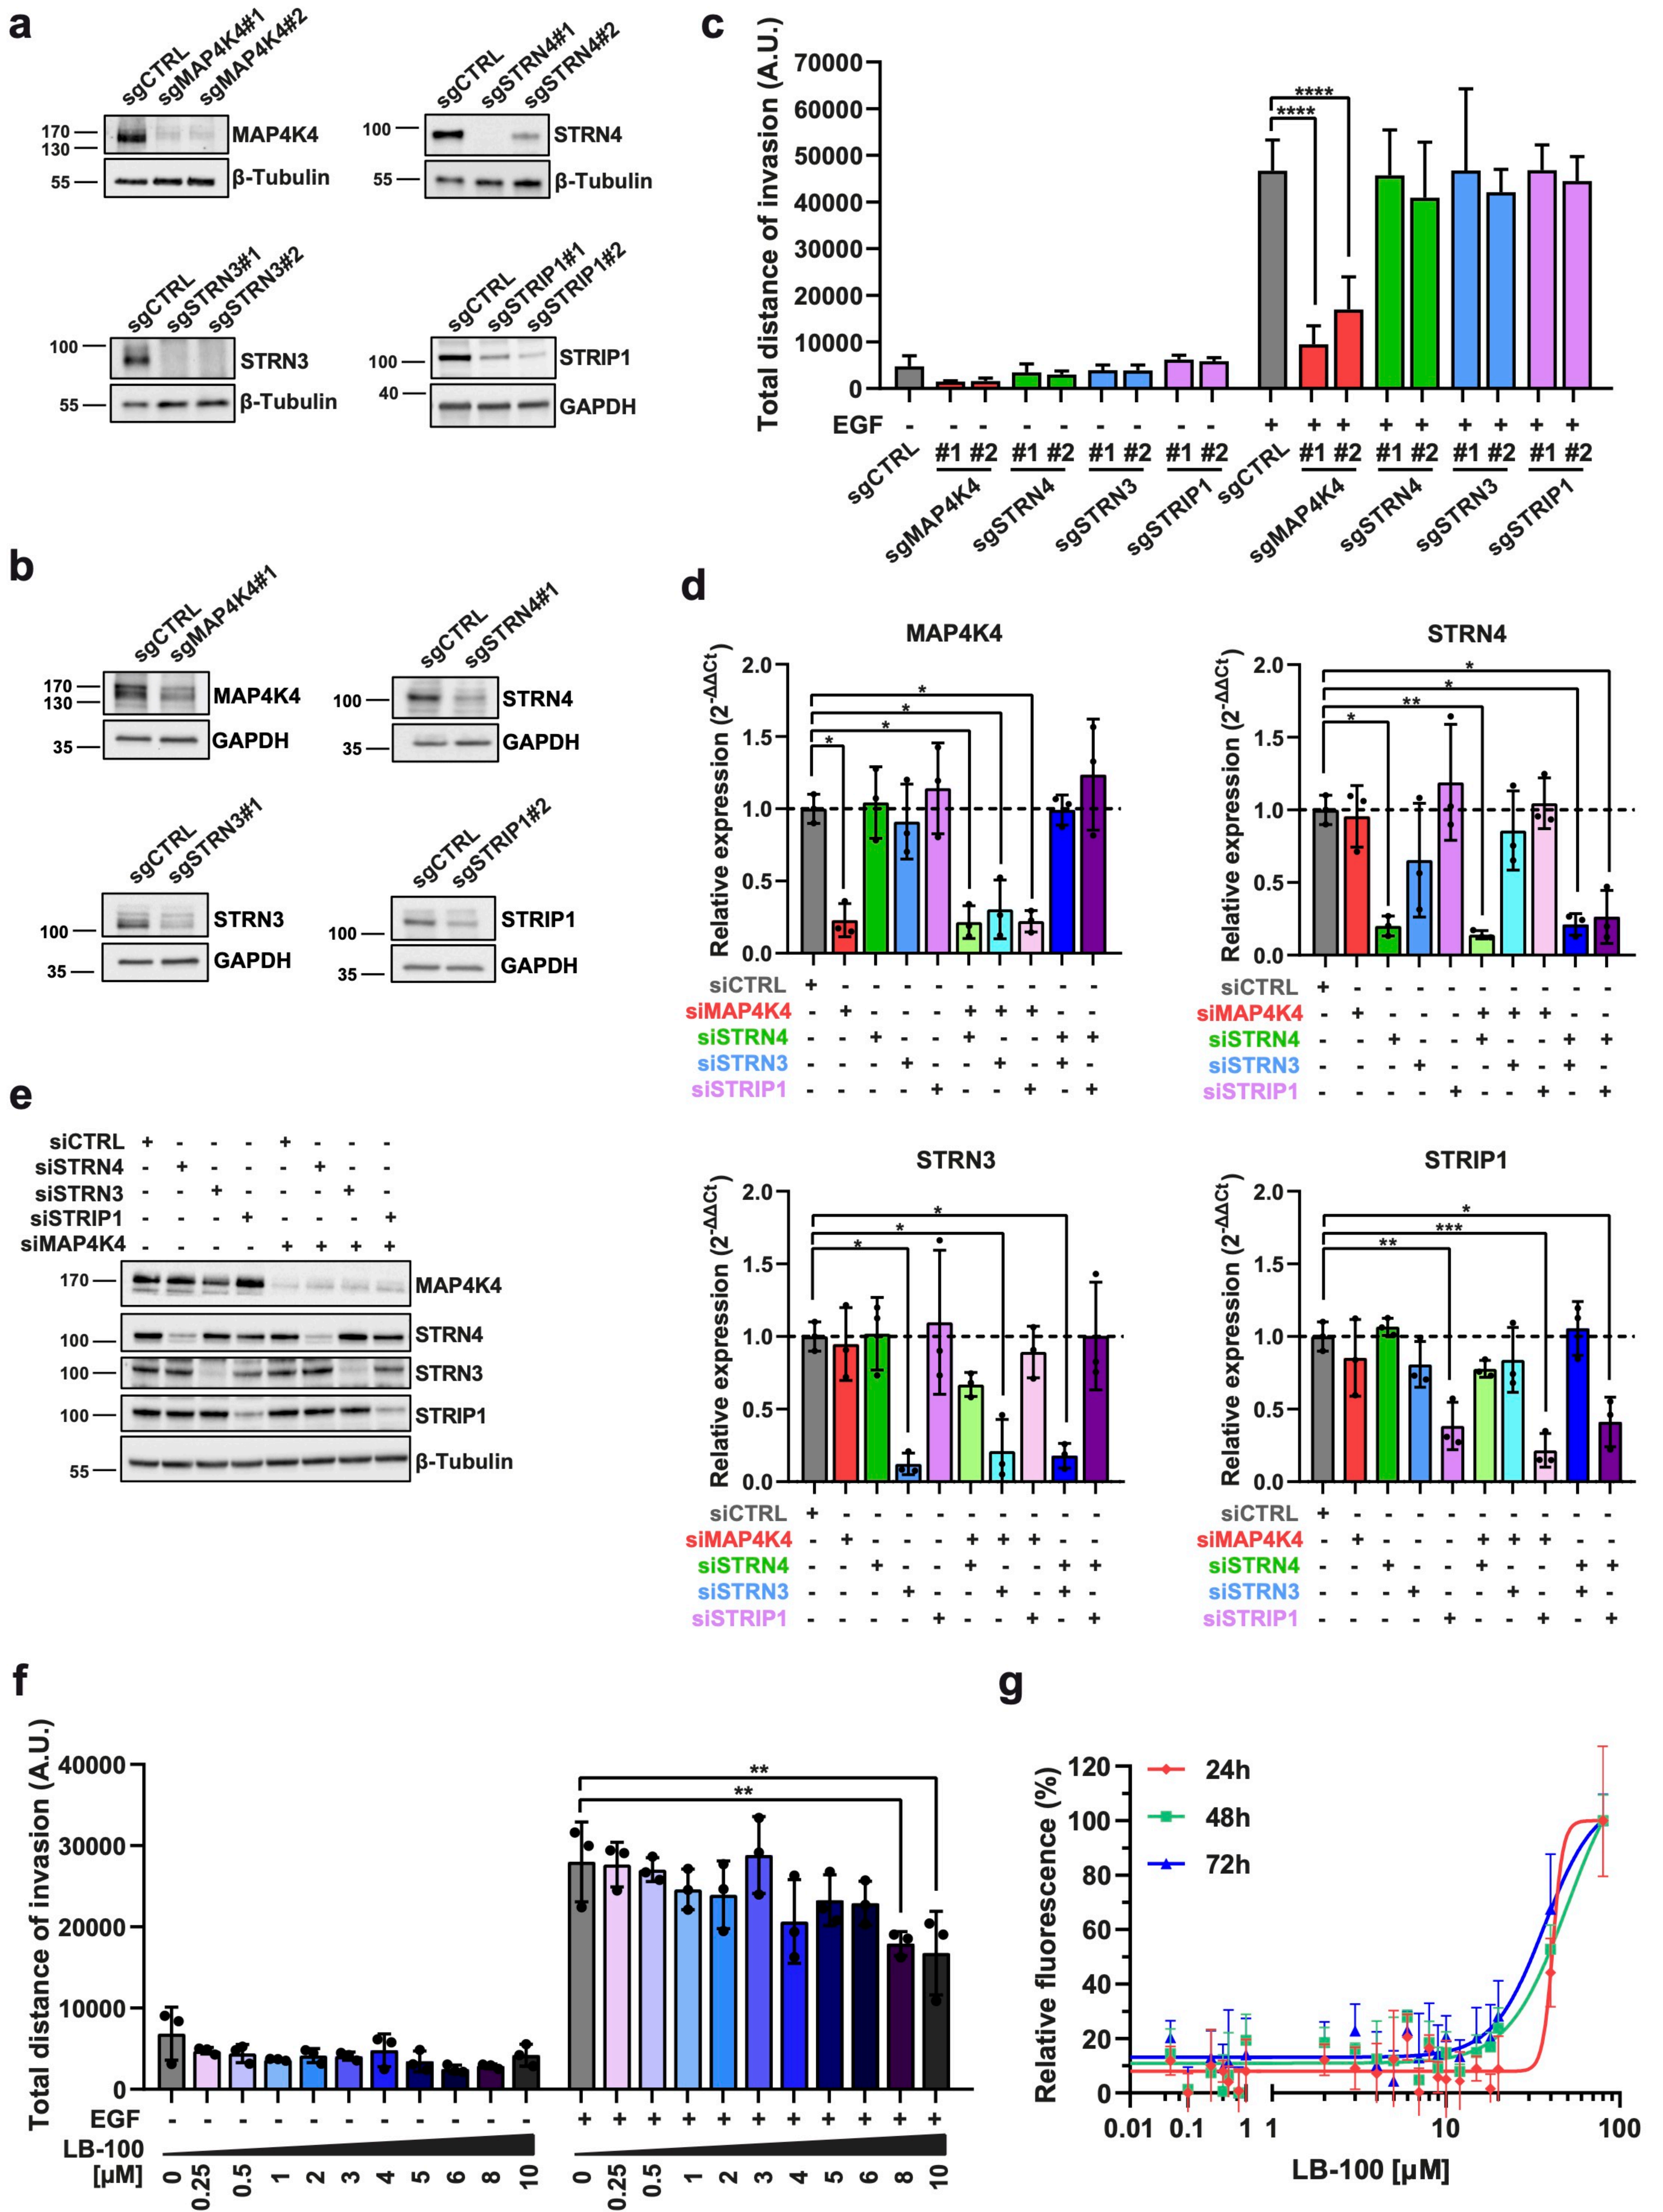



siCTRL

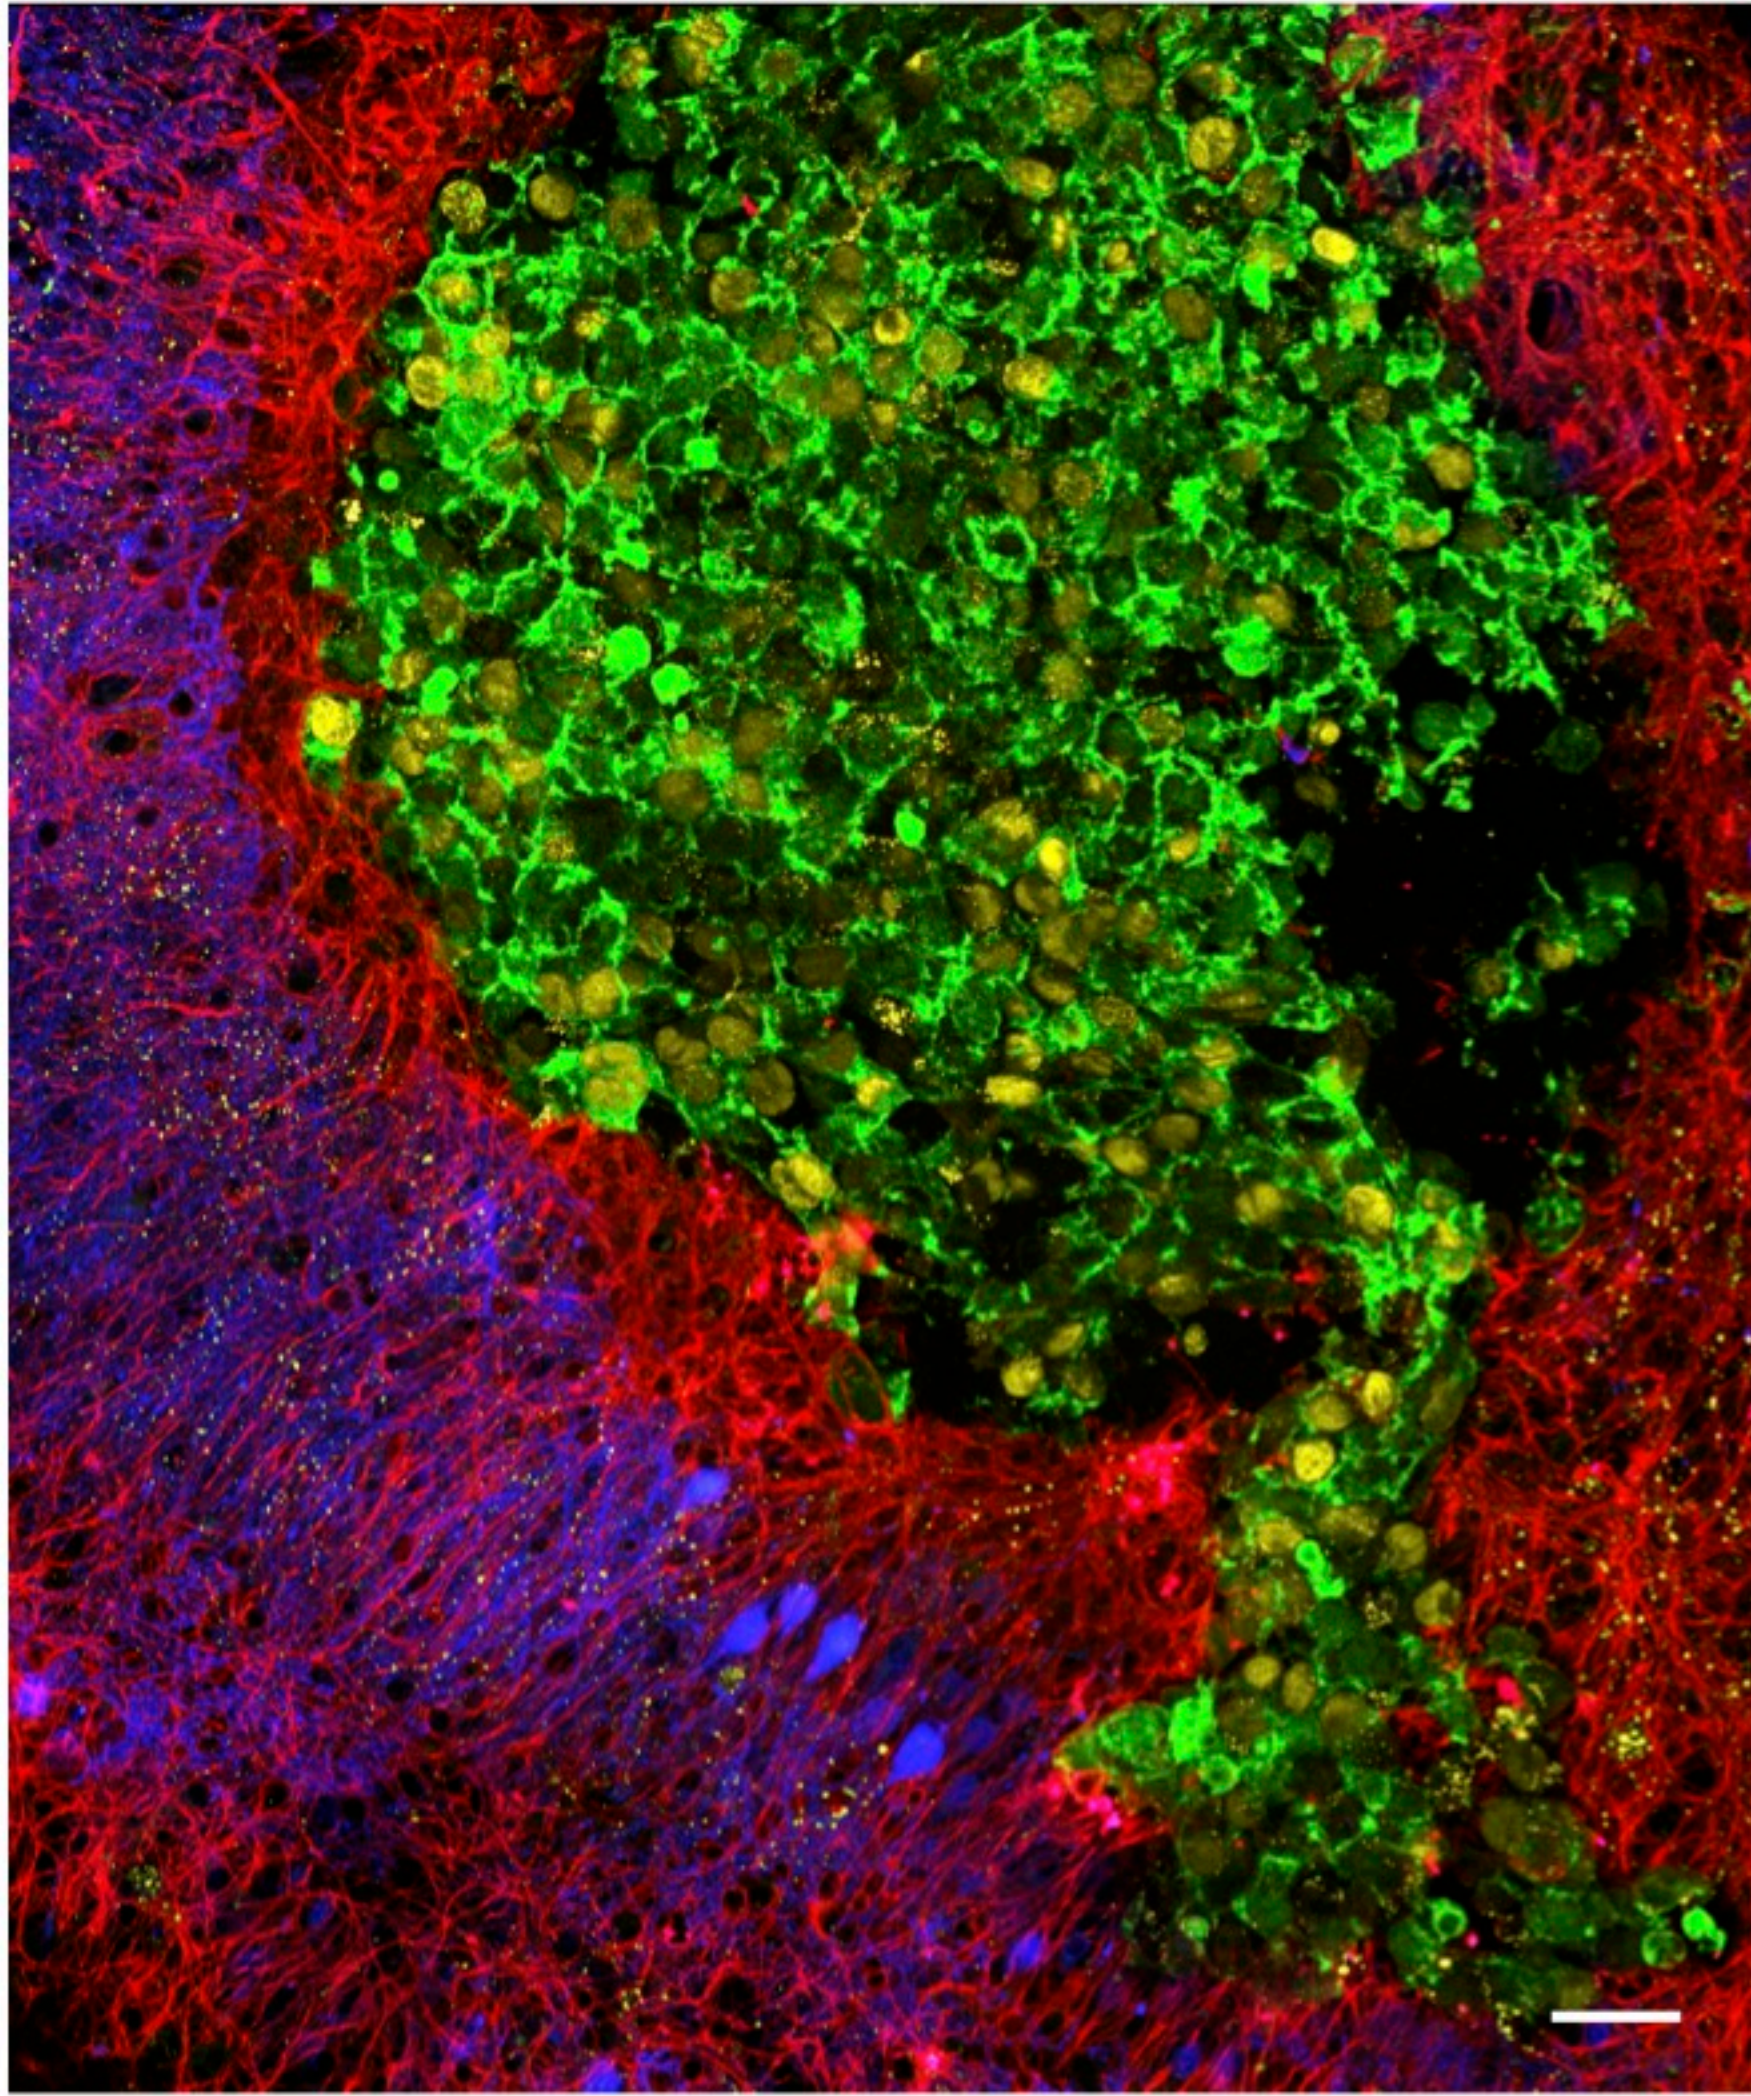

siMAP4K4

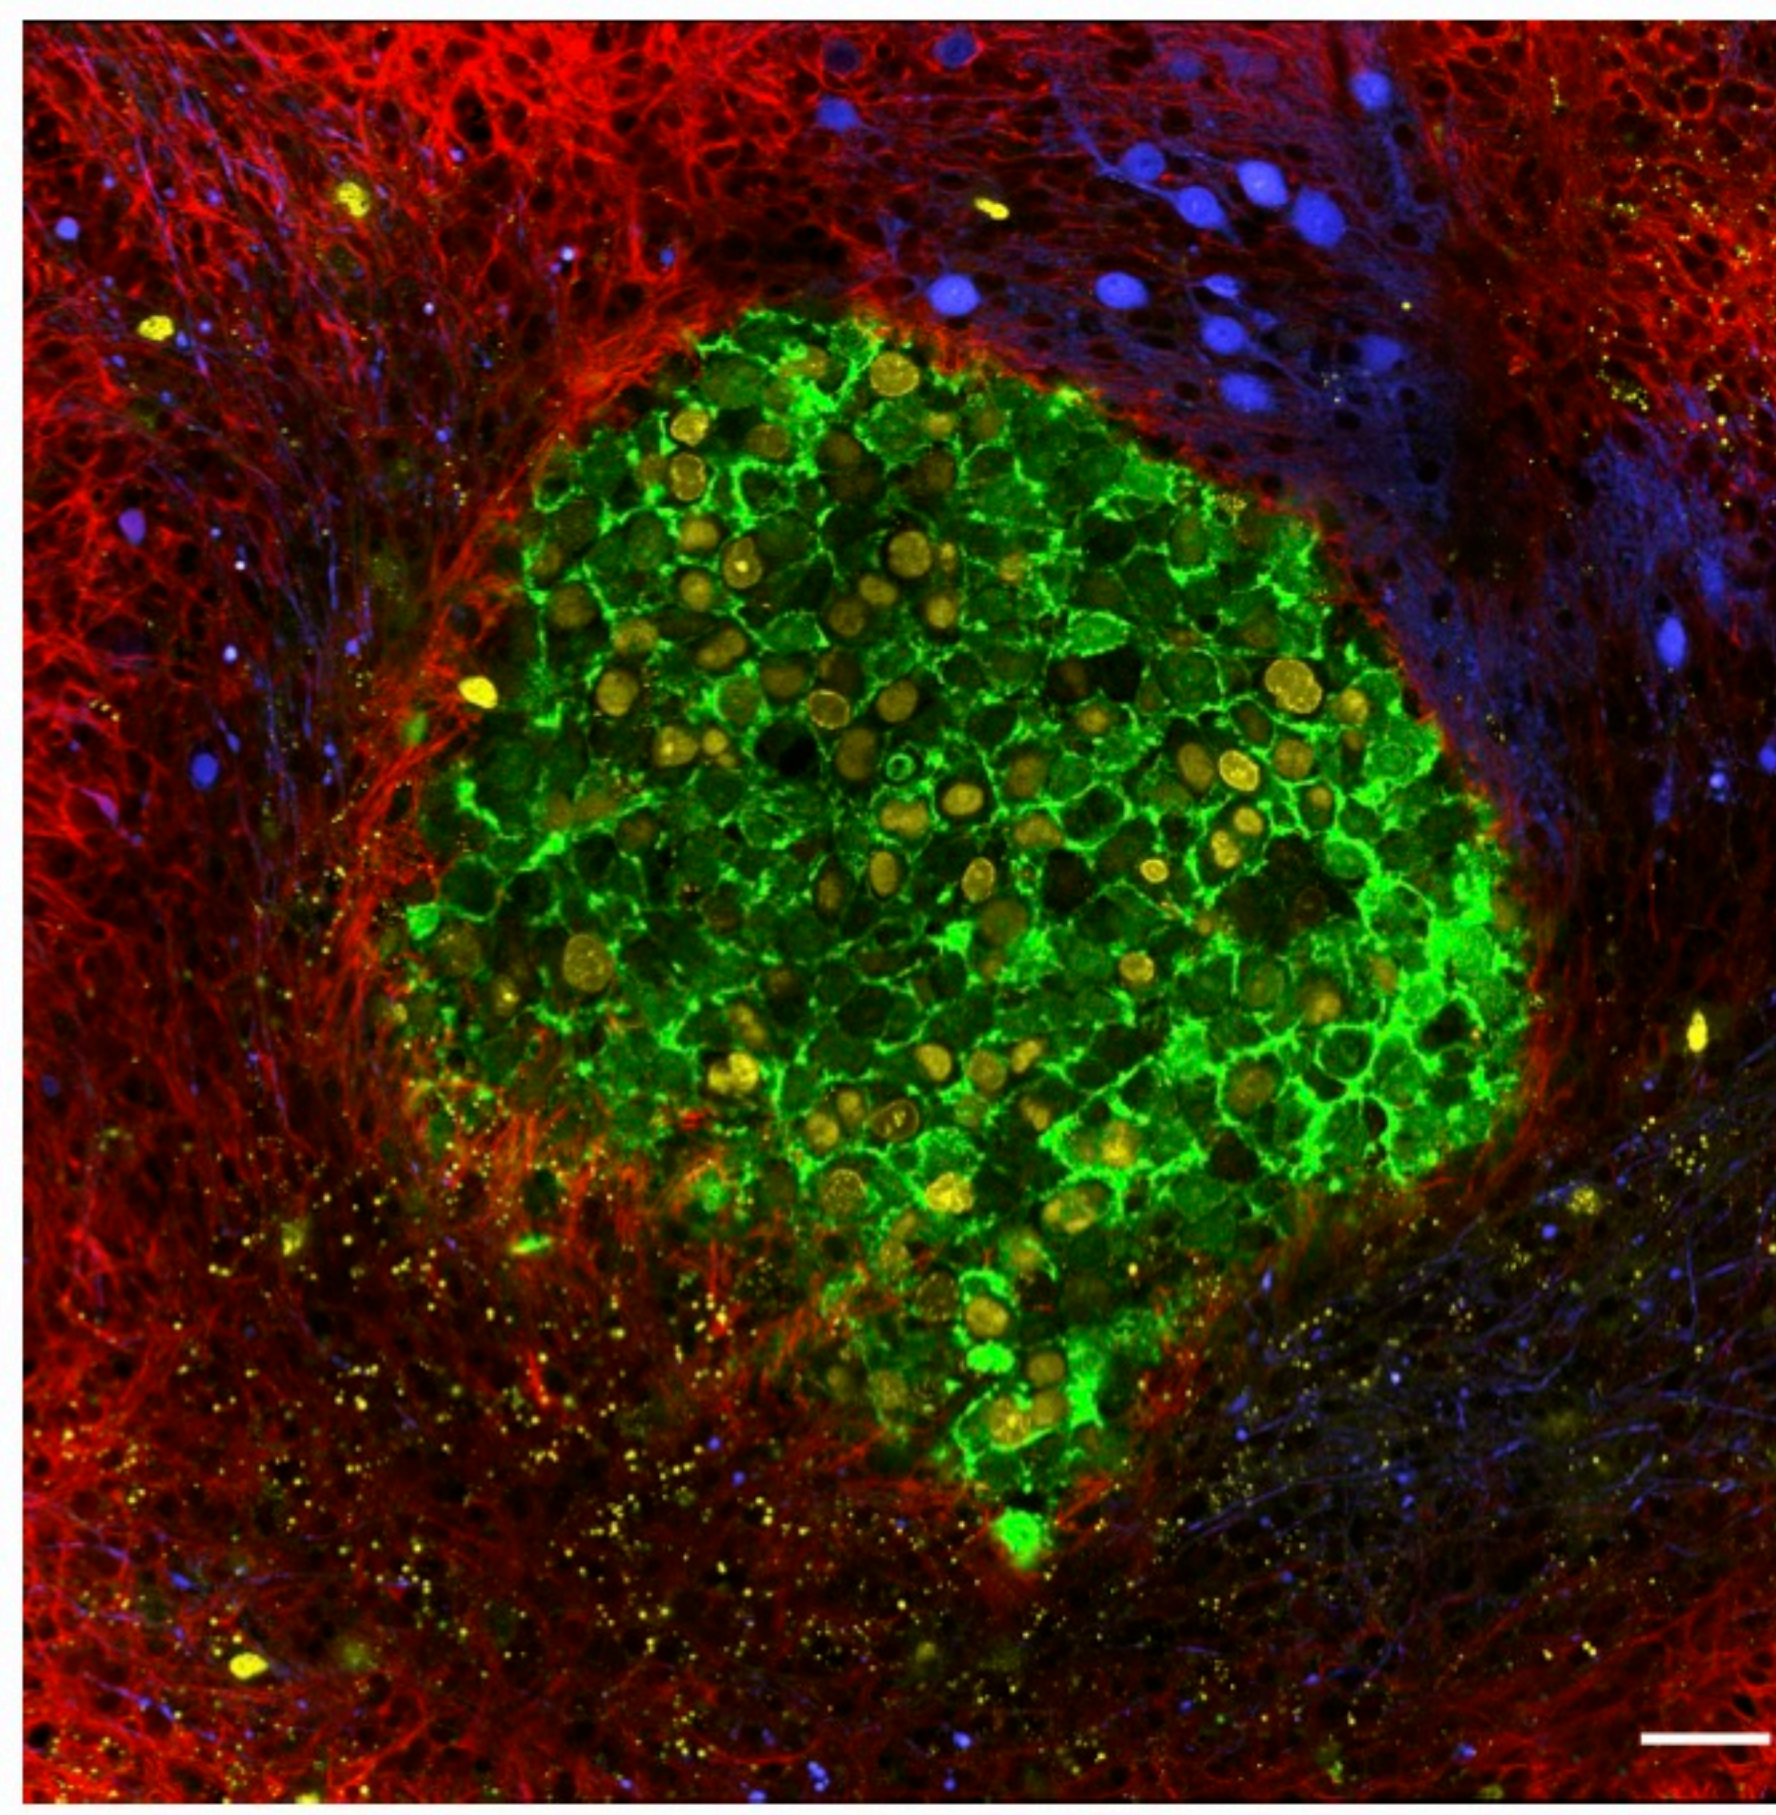

siSTRN4

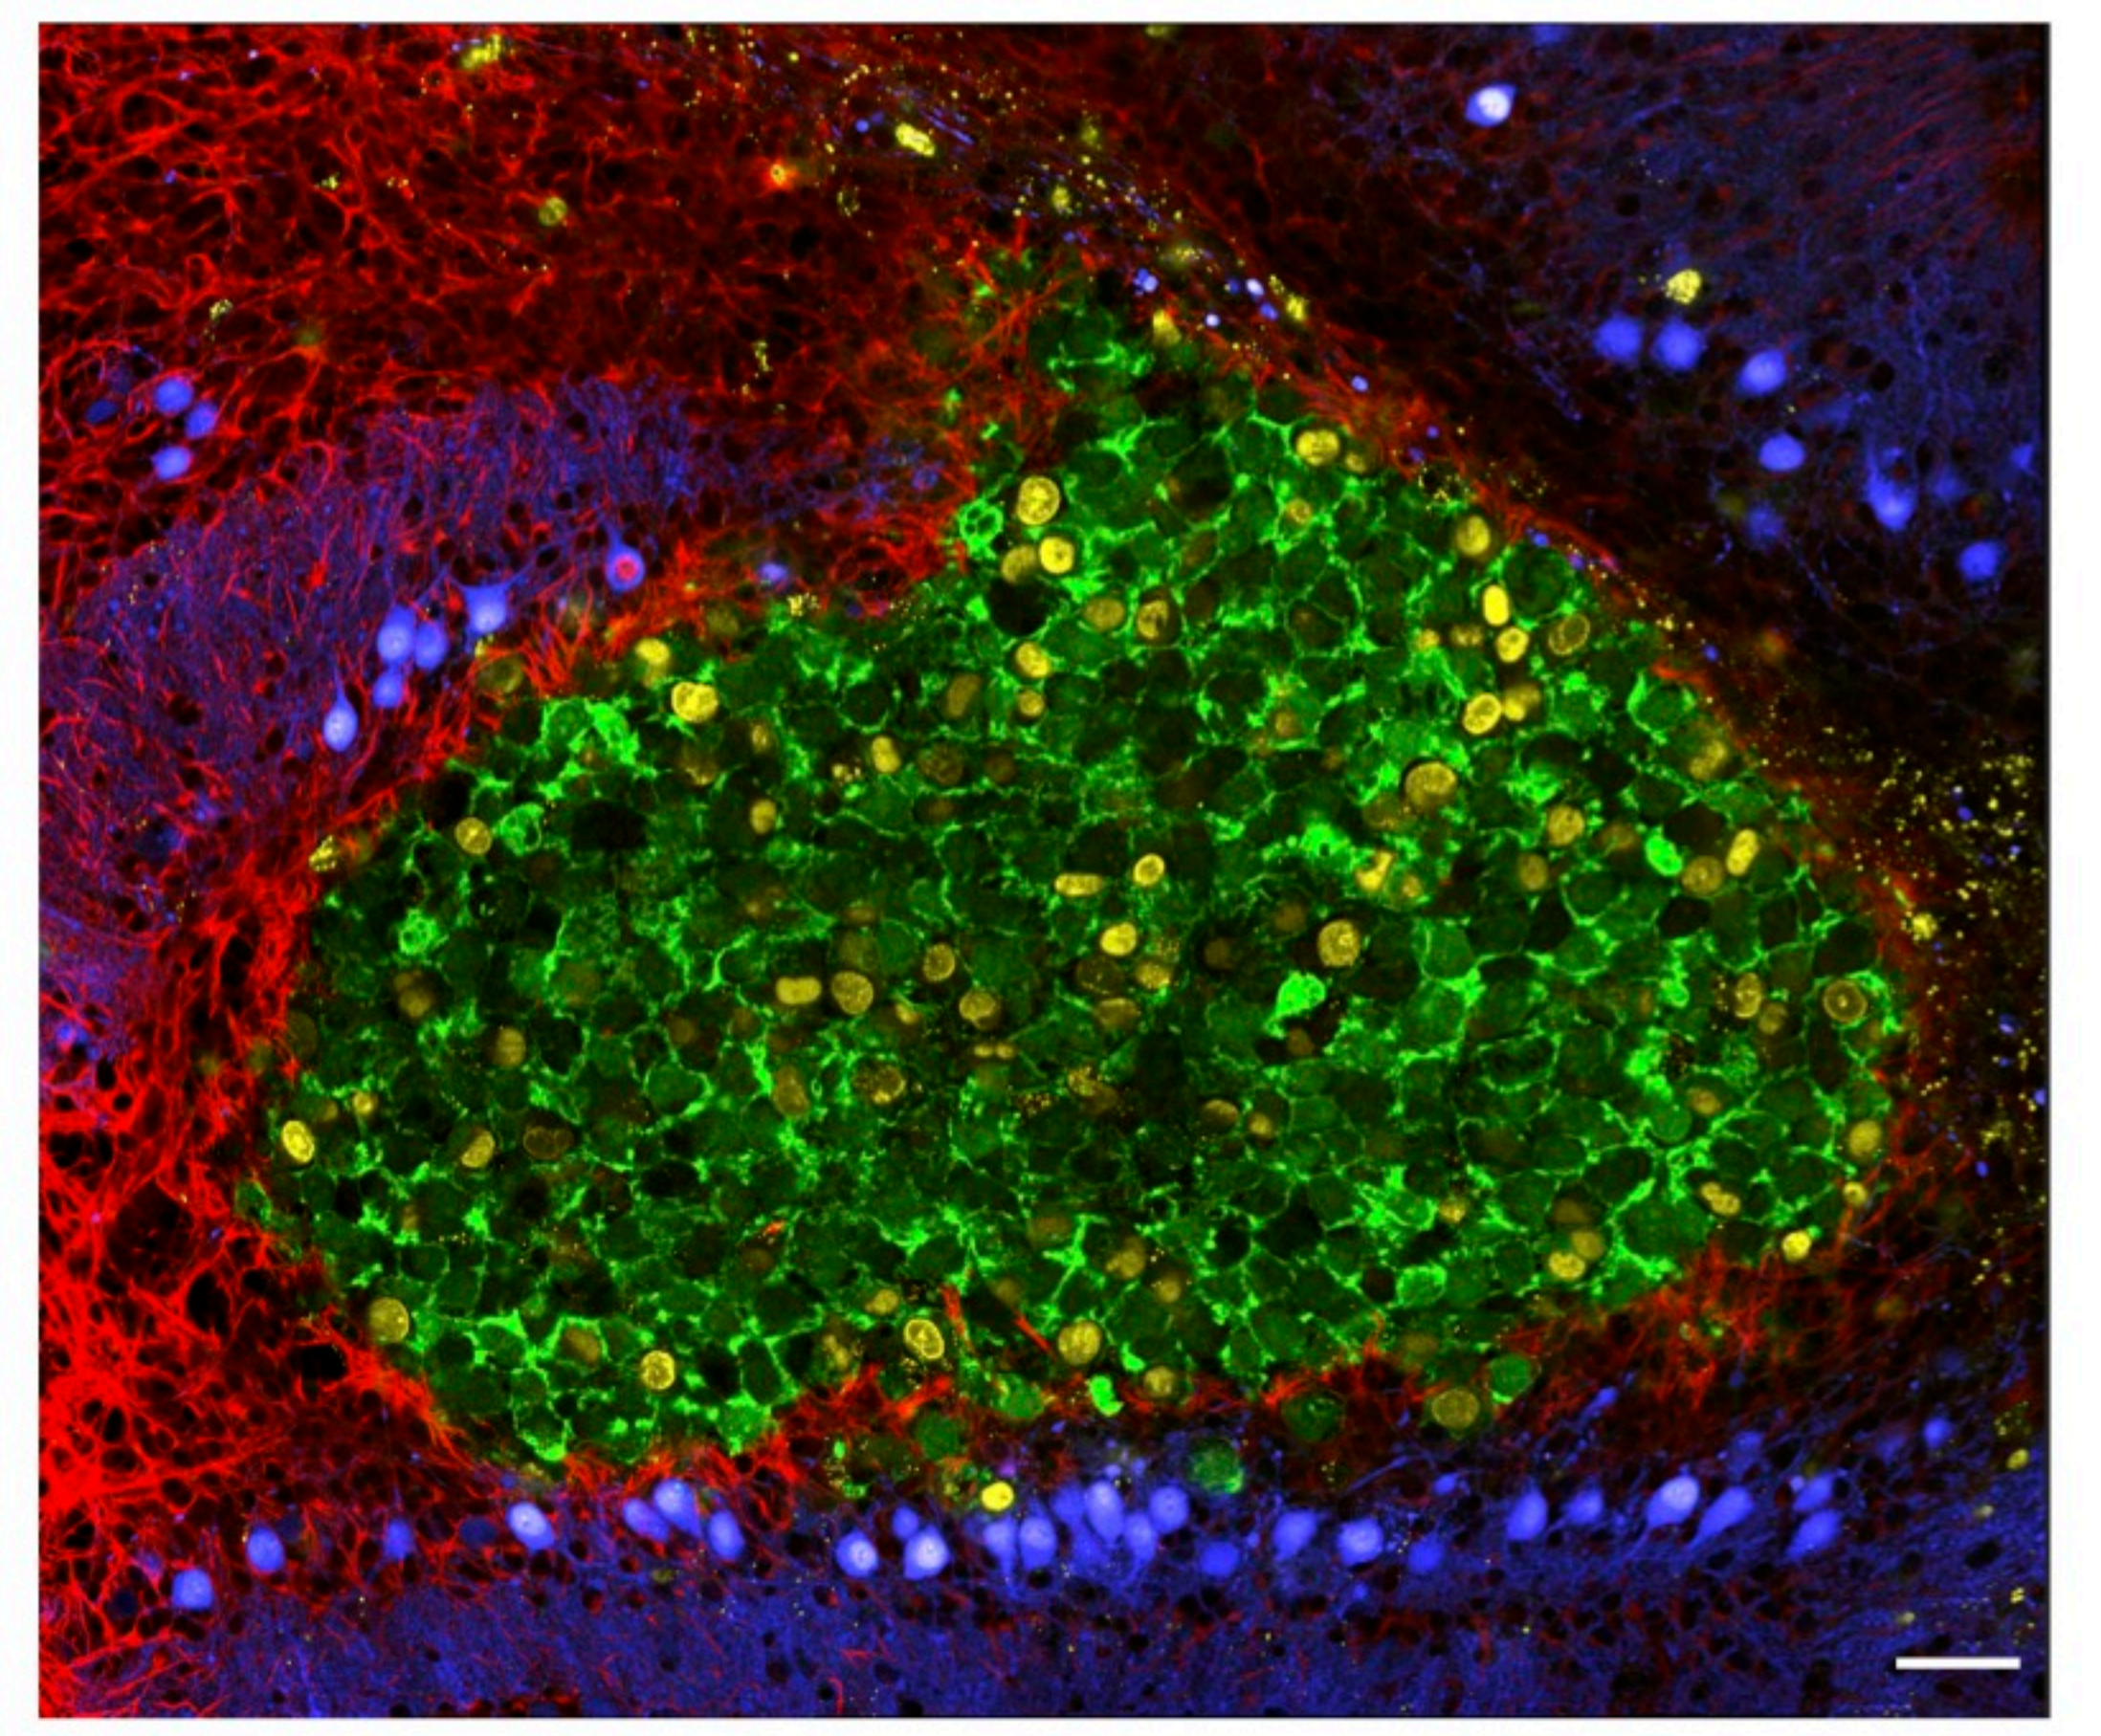

siSTRN3

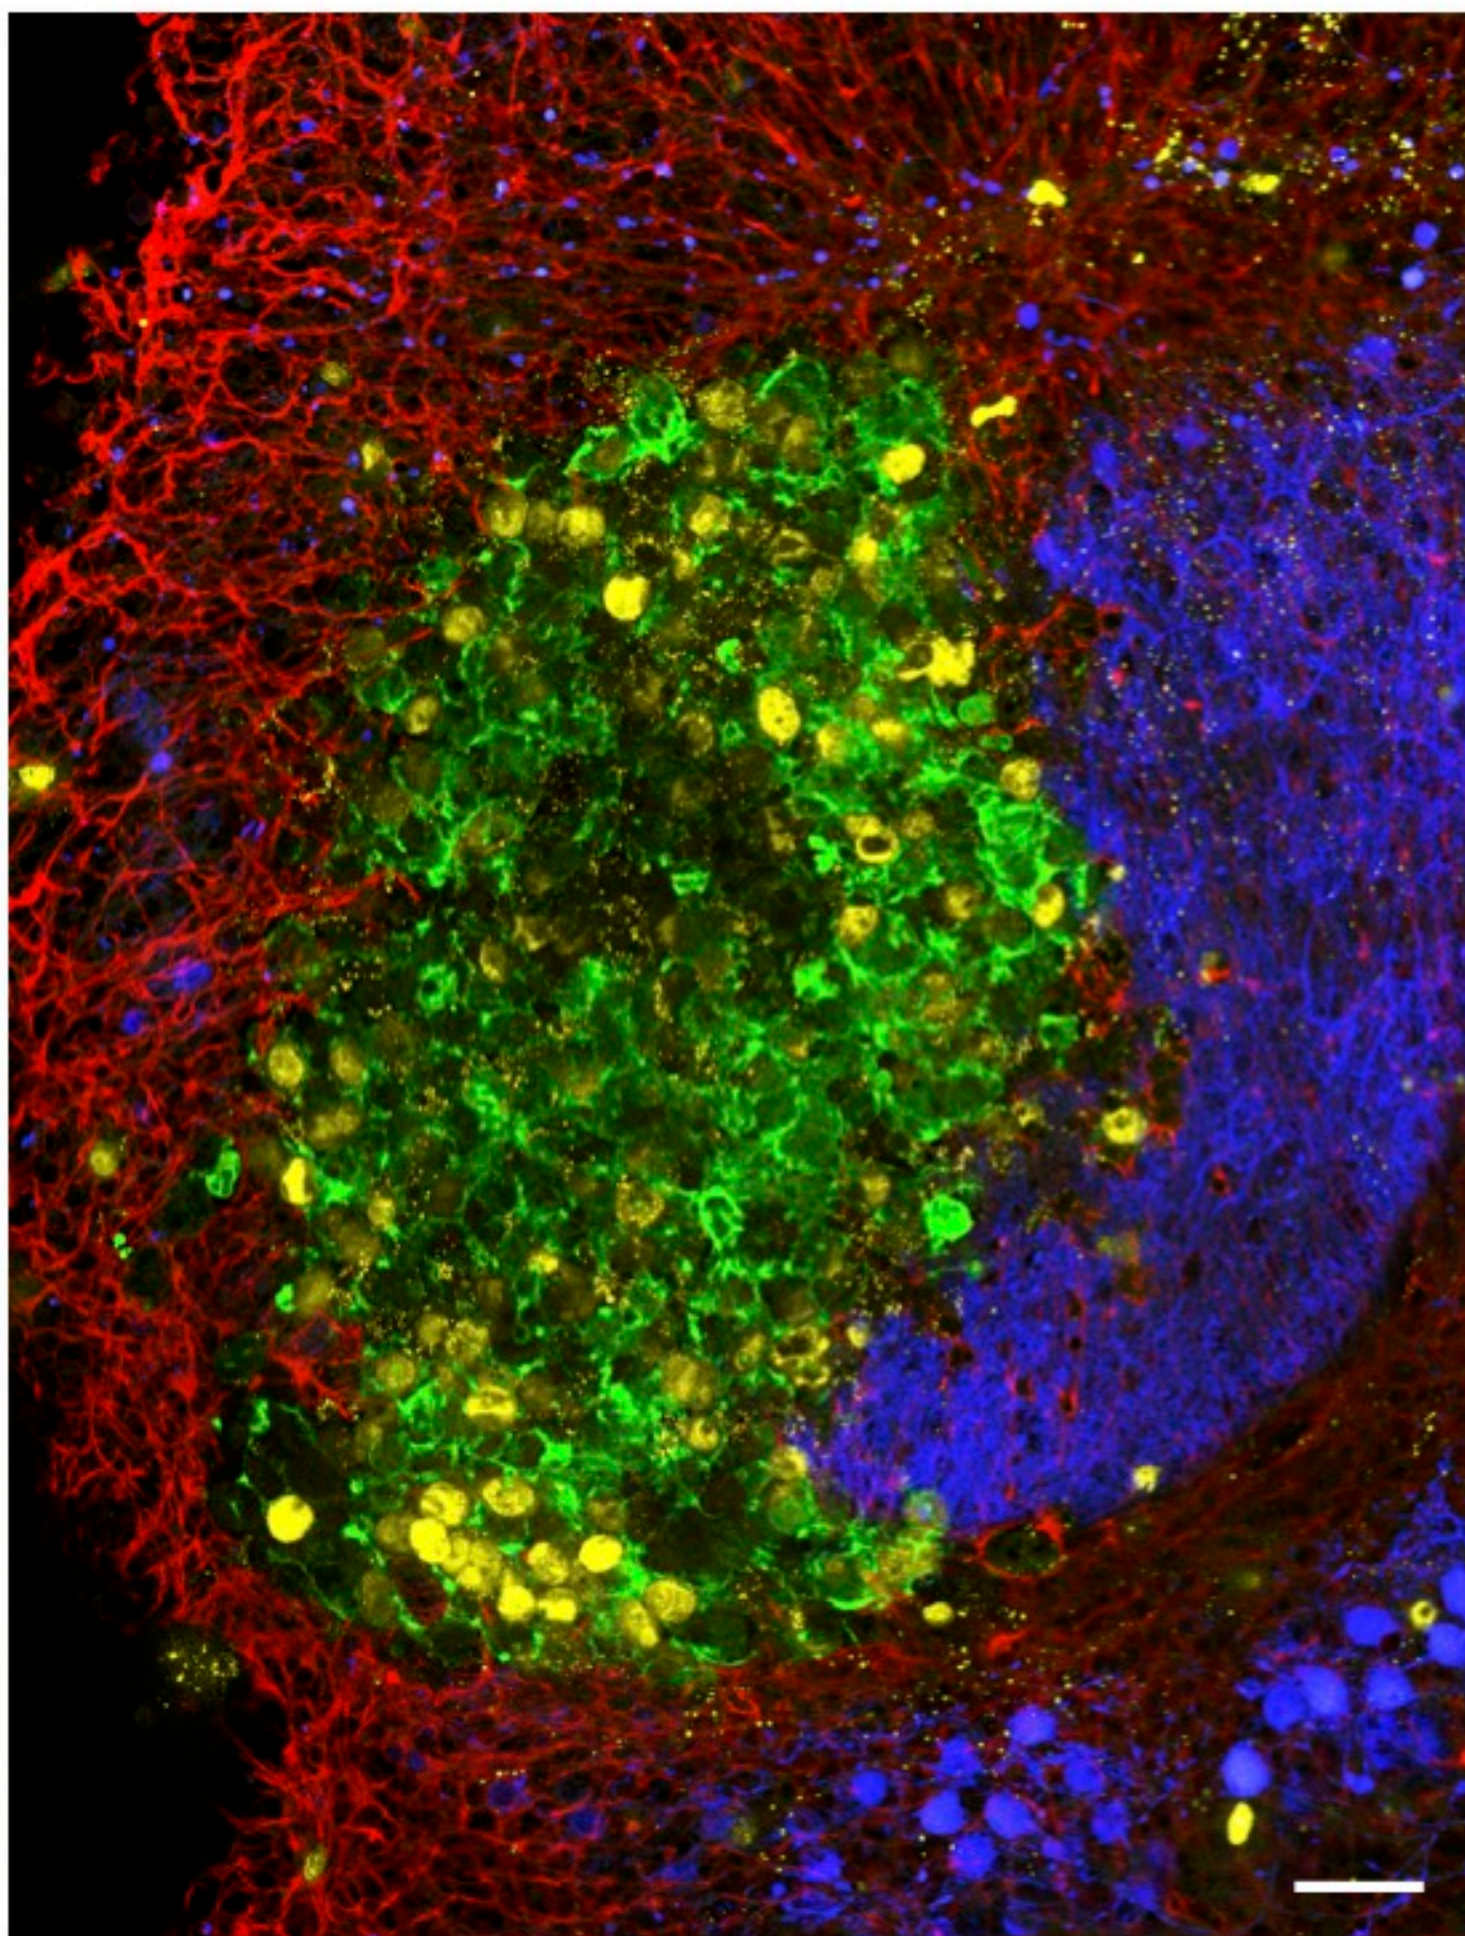

siSTRIP1

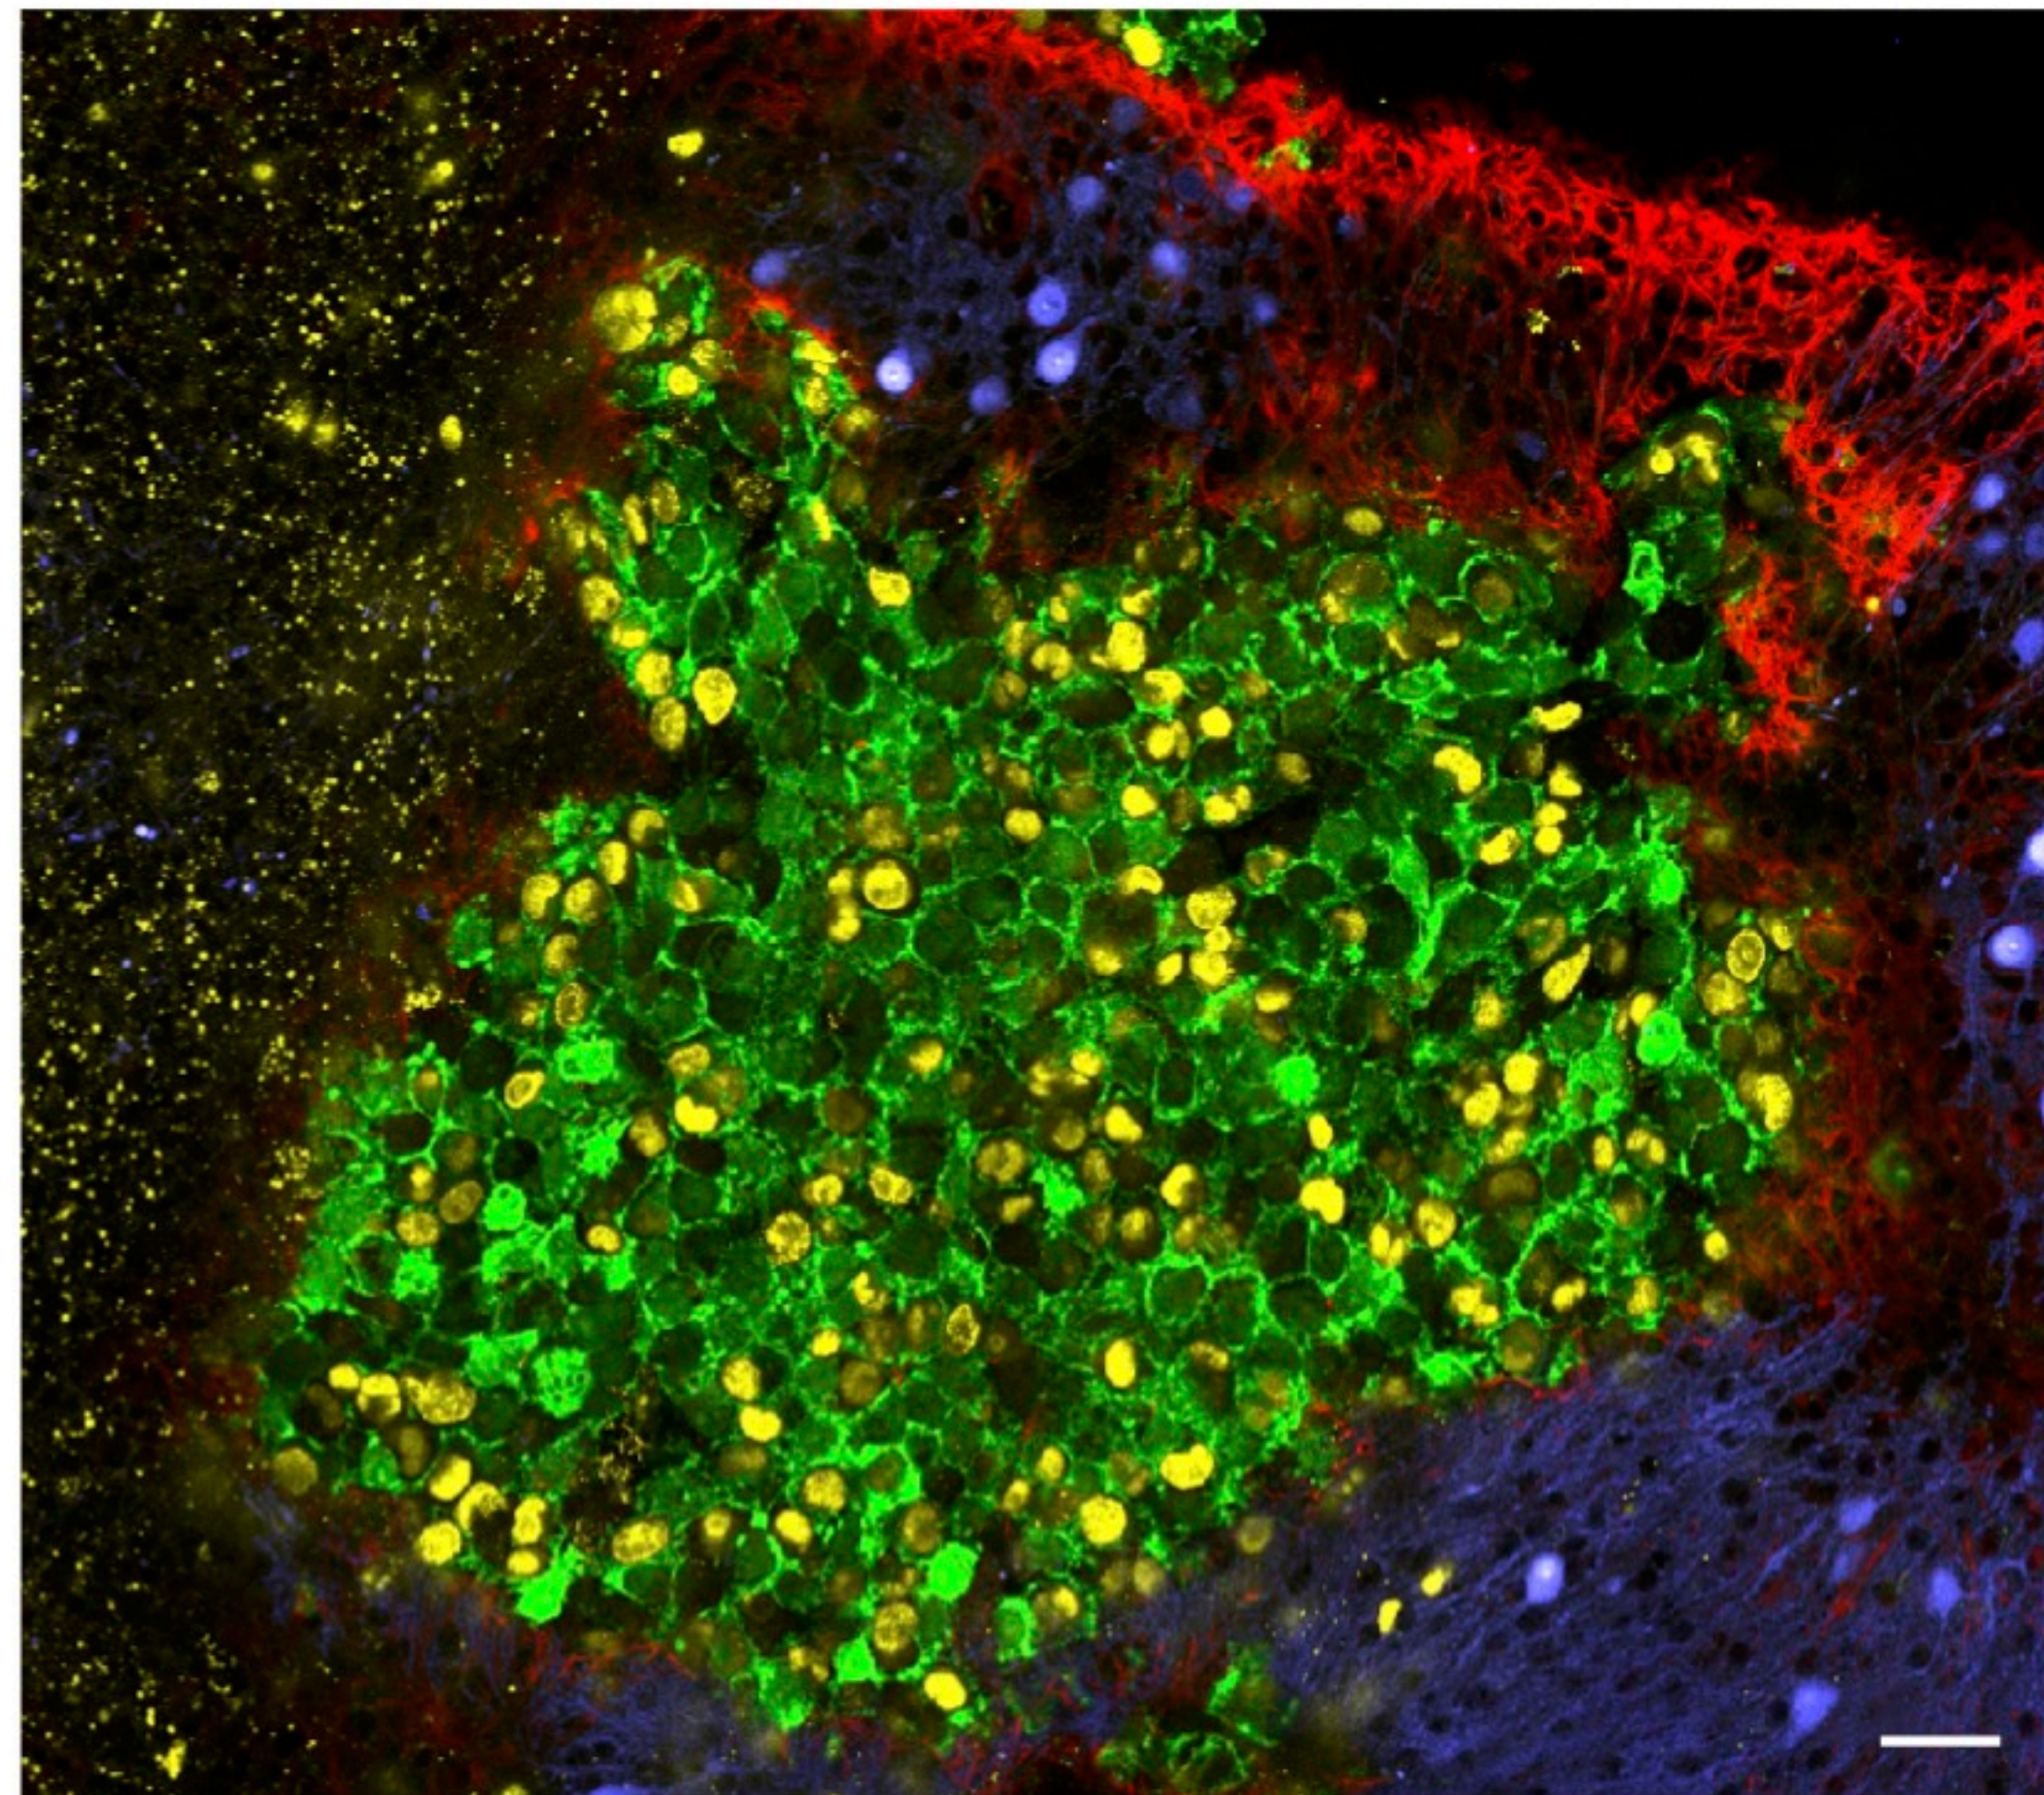

siMAP4K4+siSTRN3

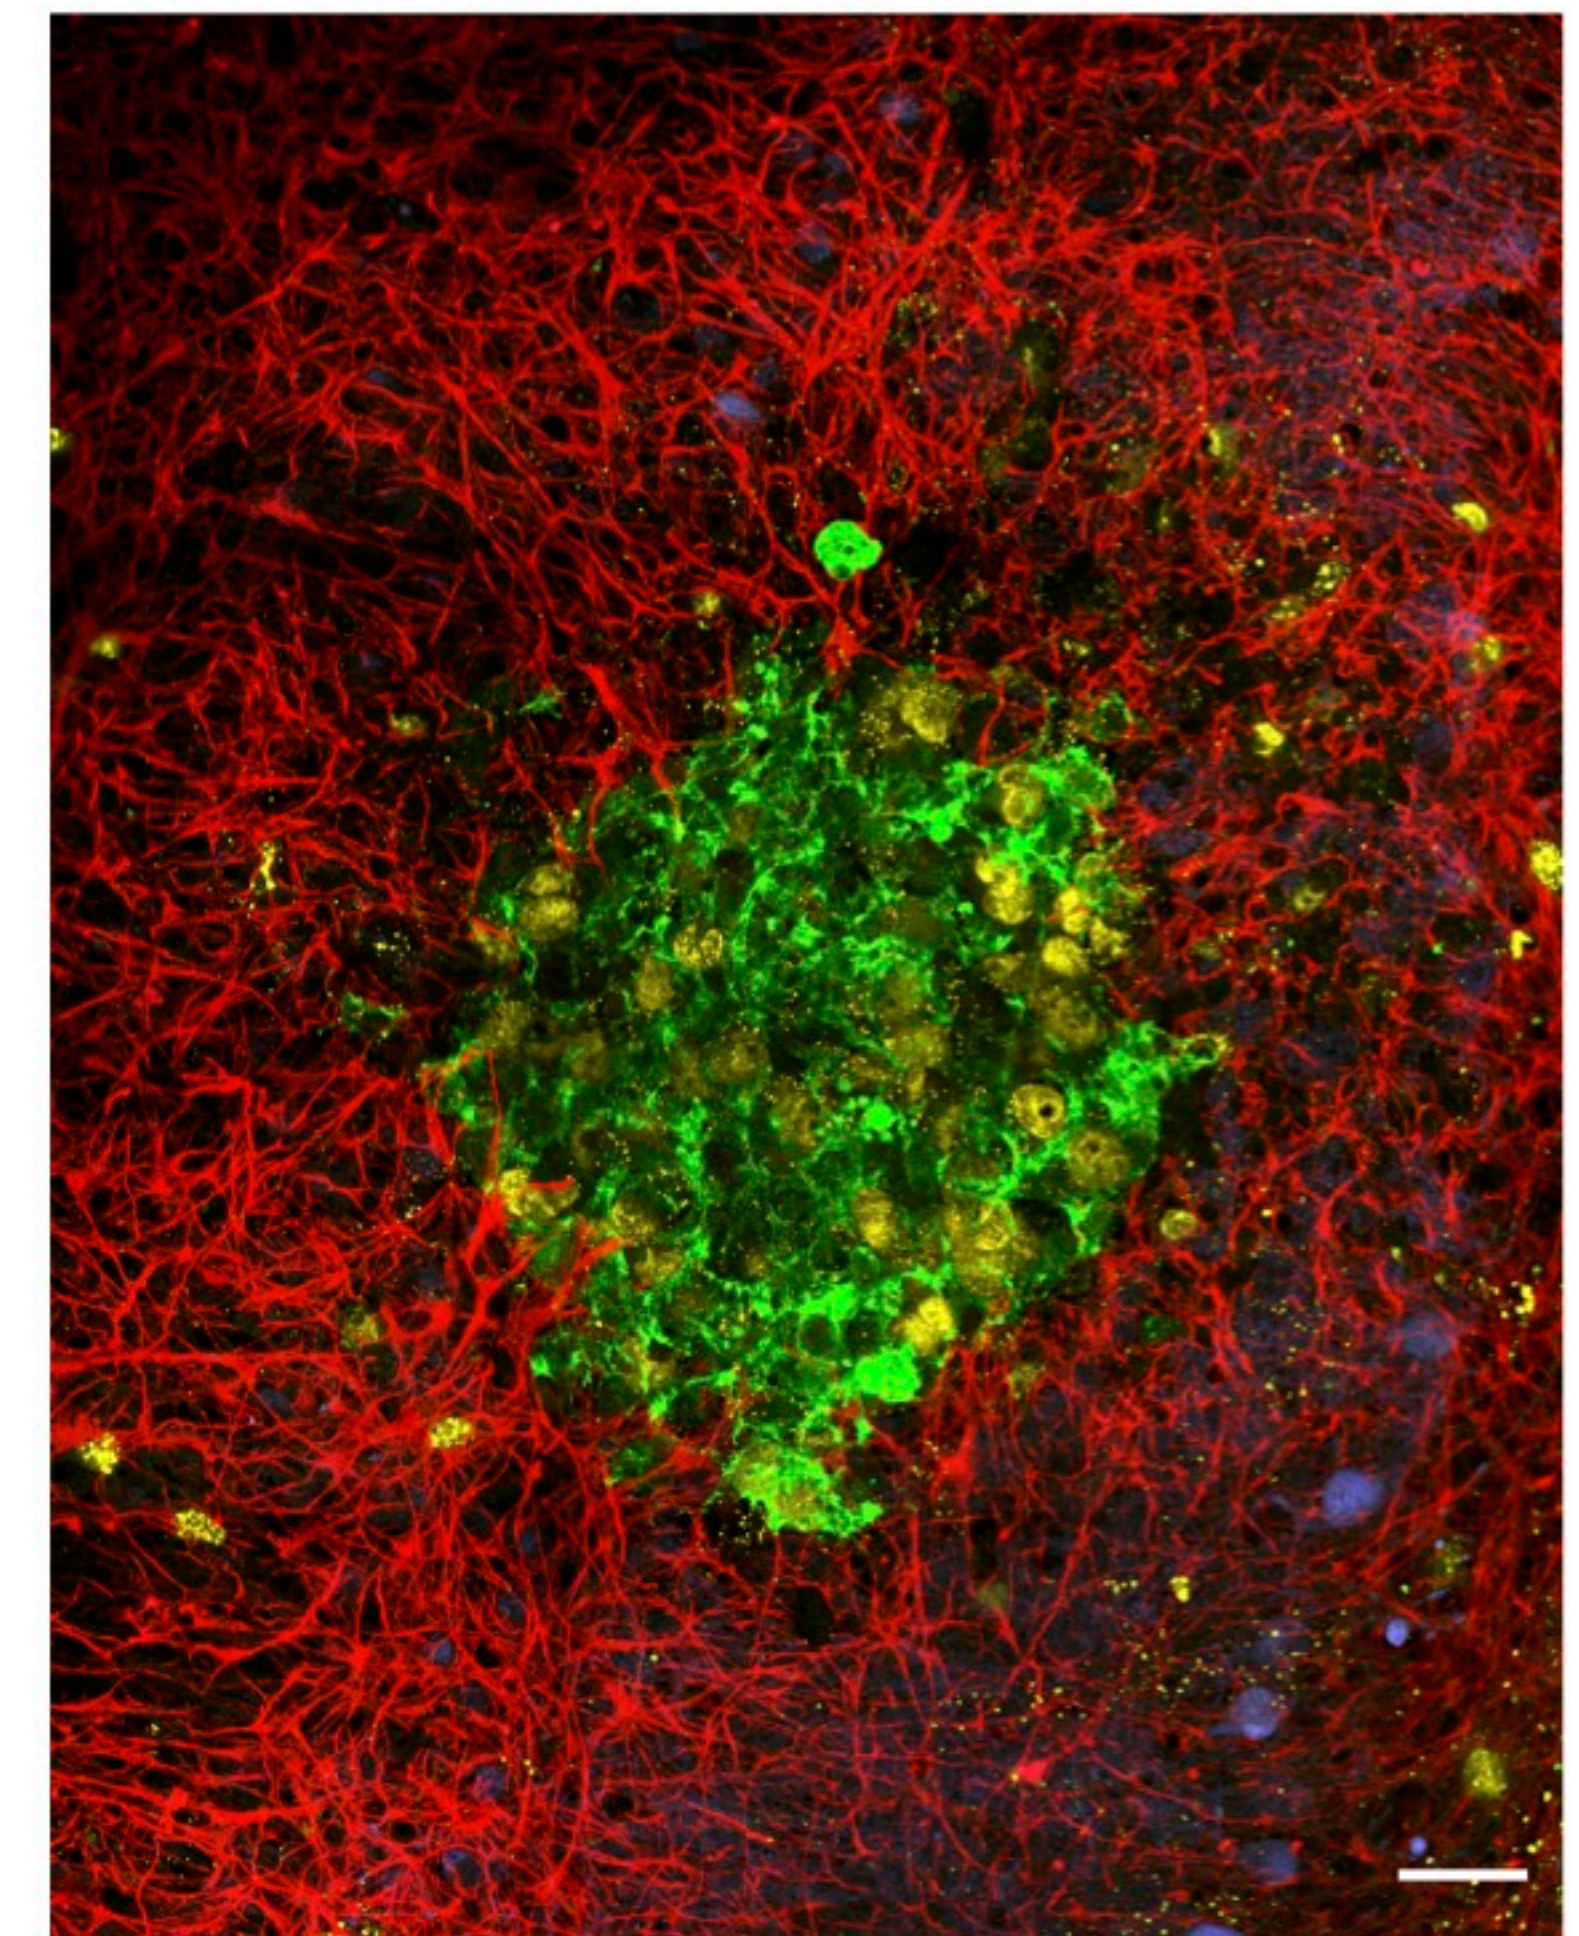



Figure S5

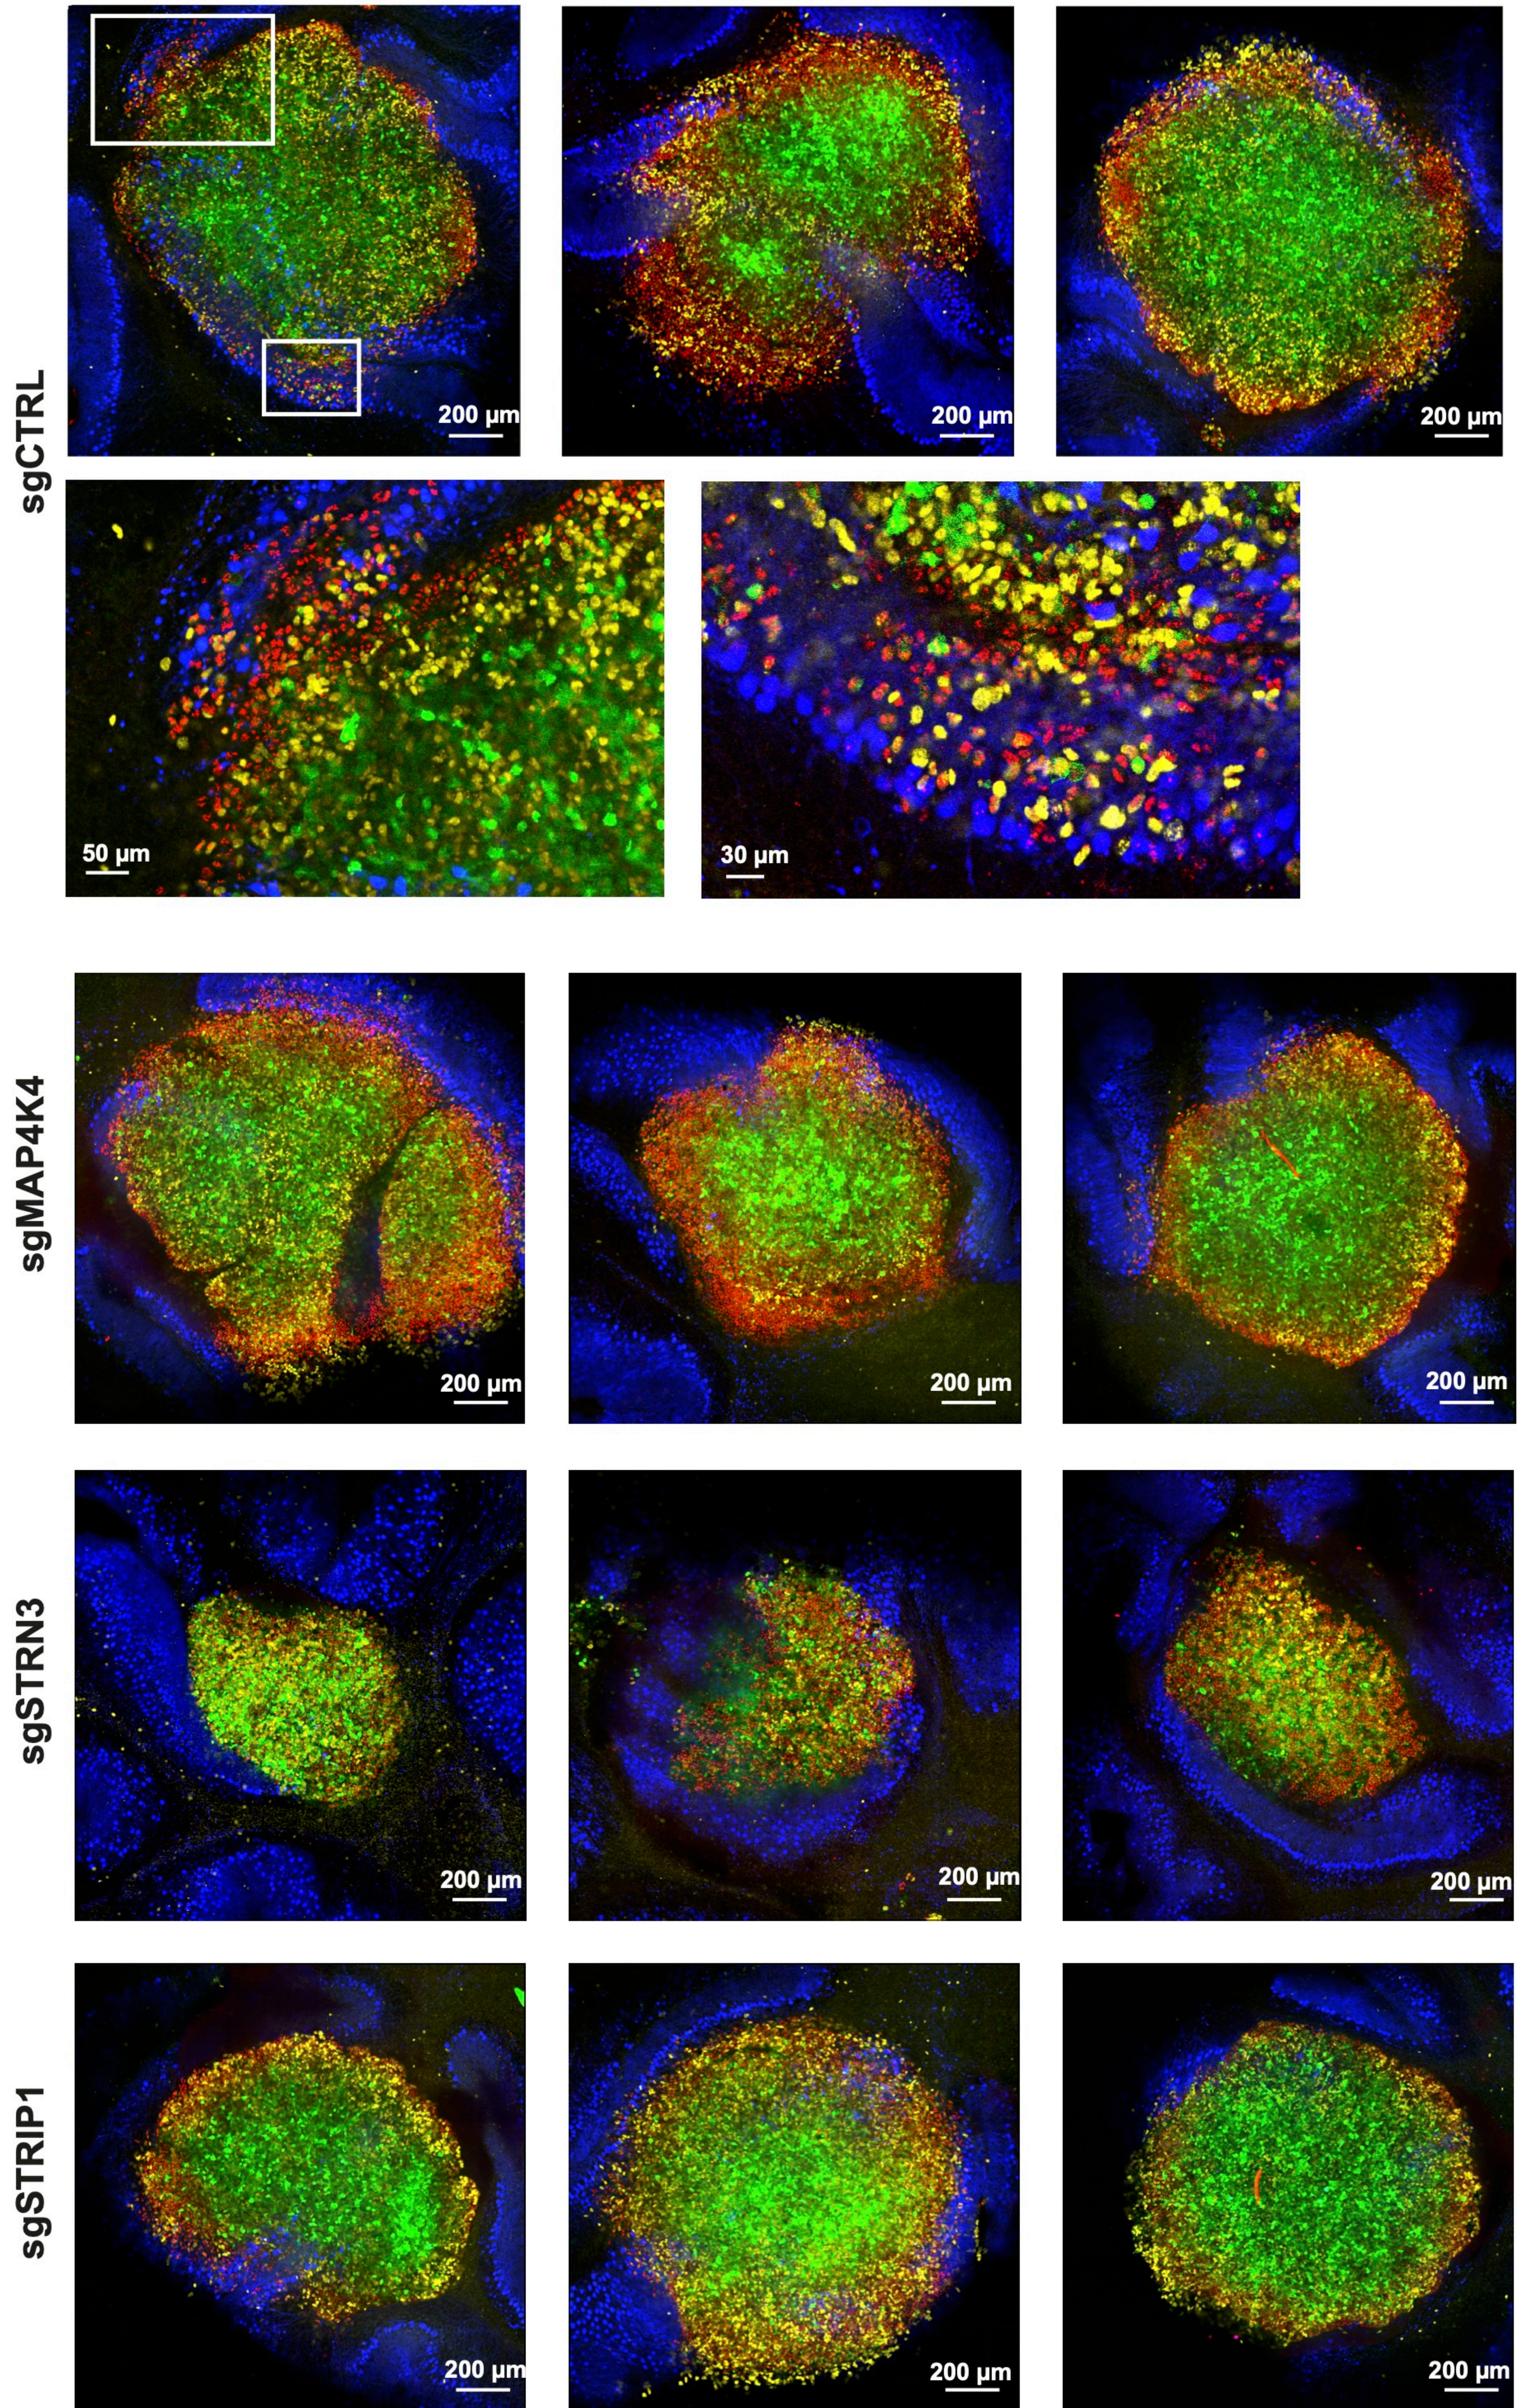



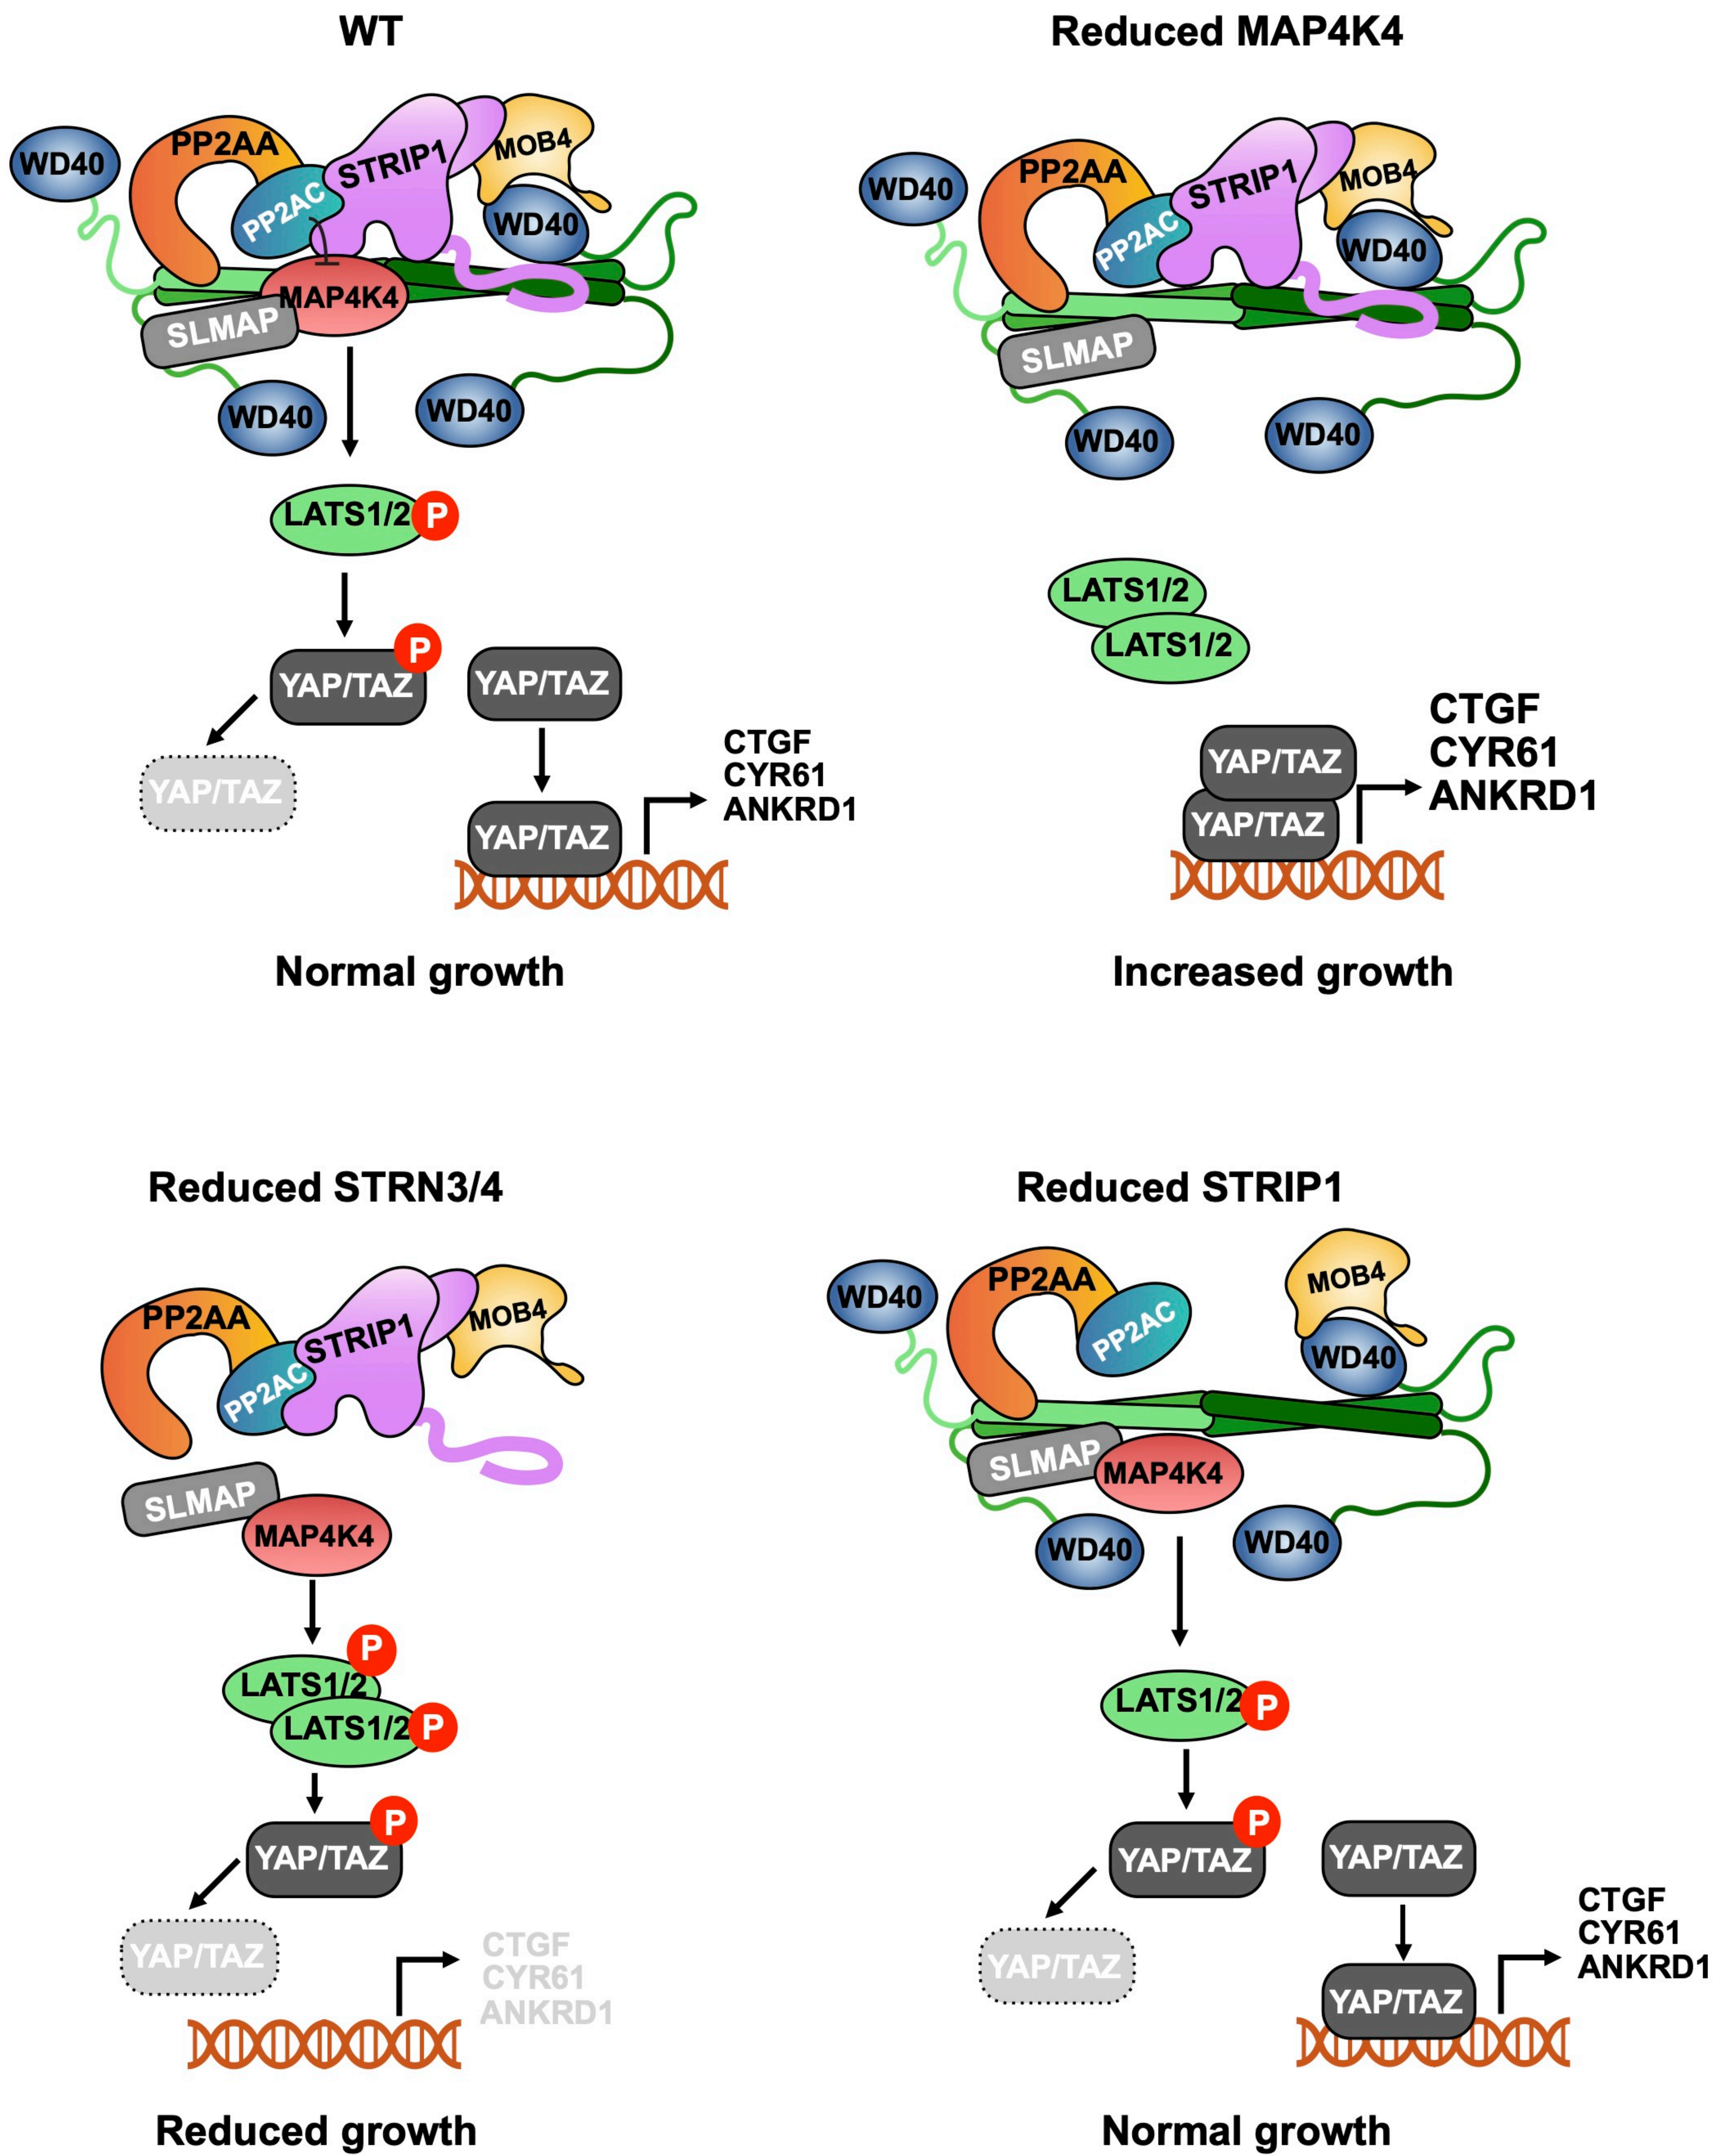



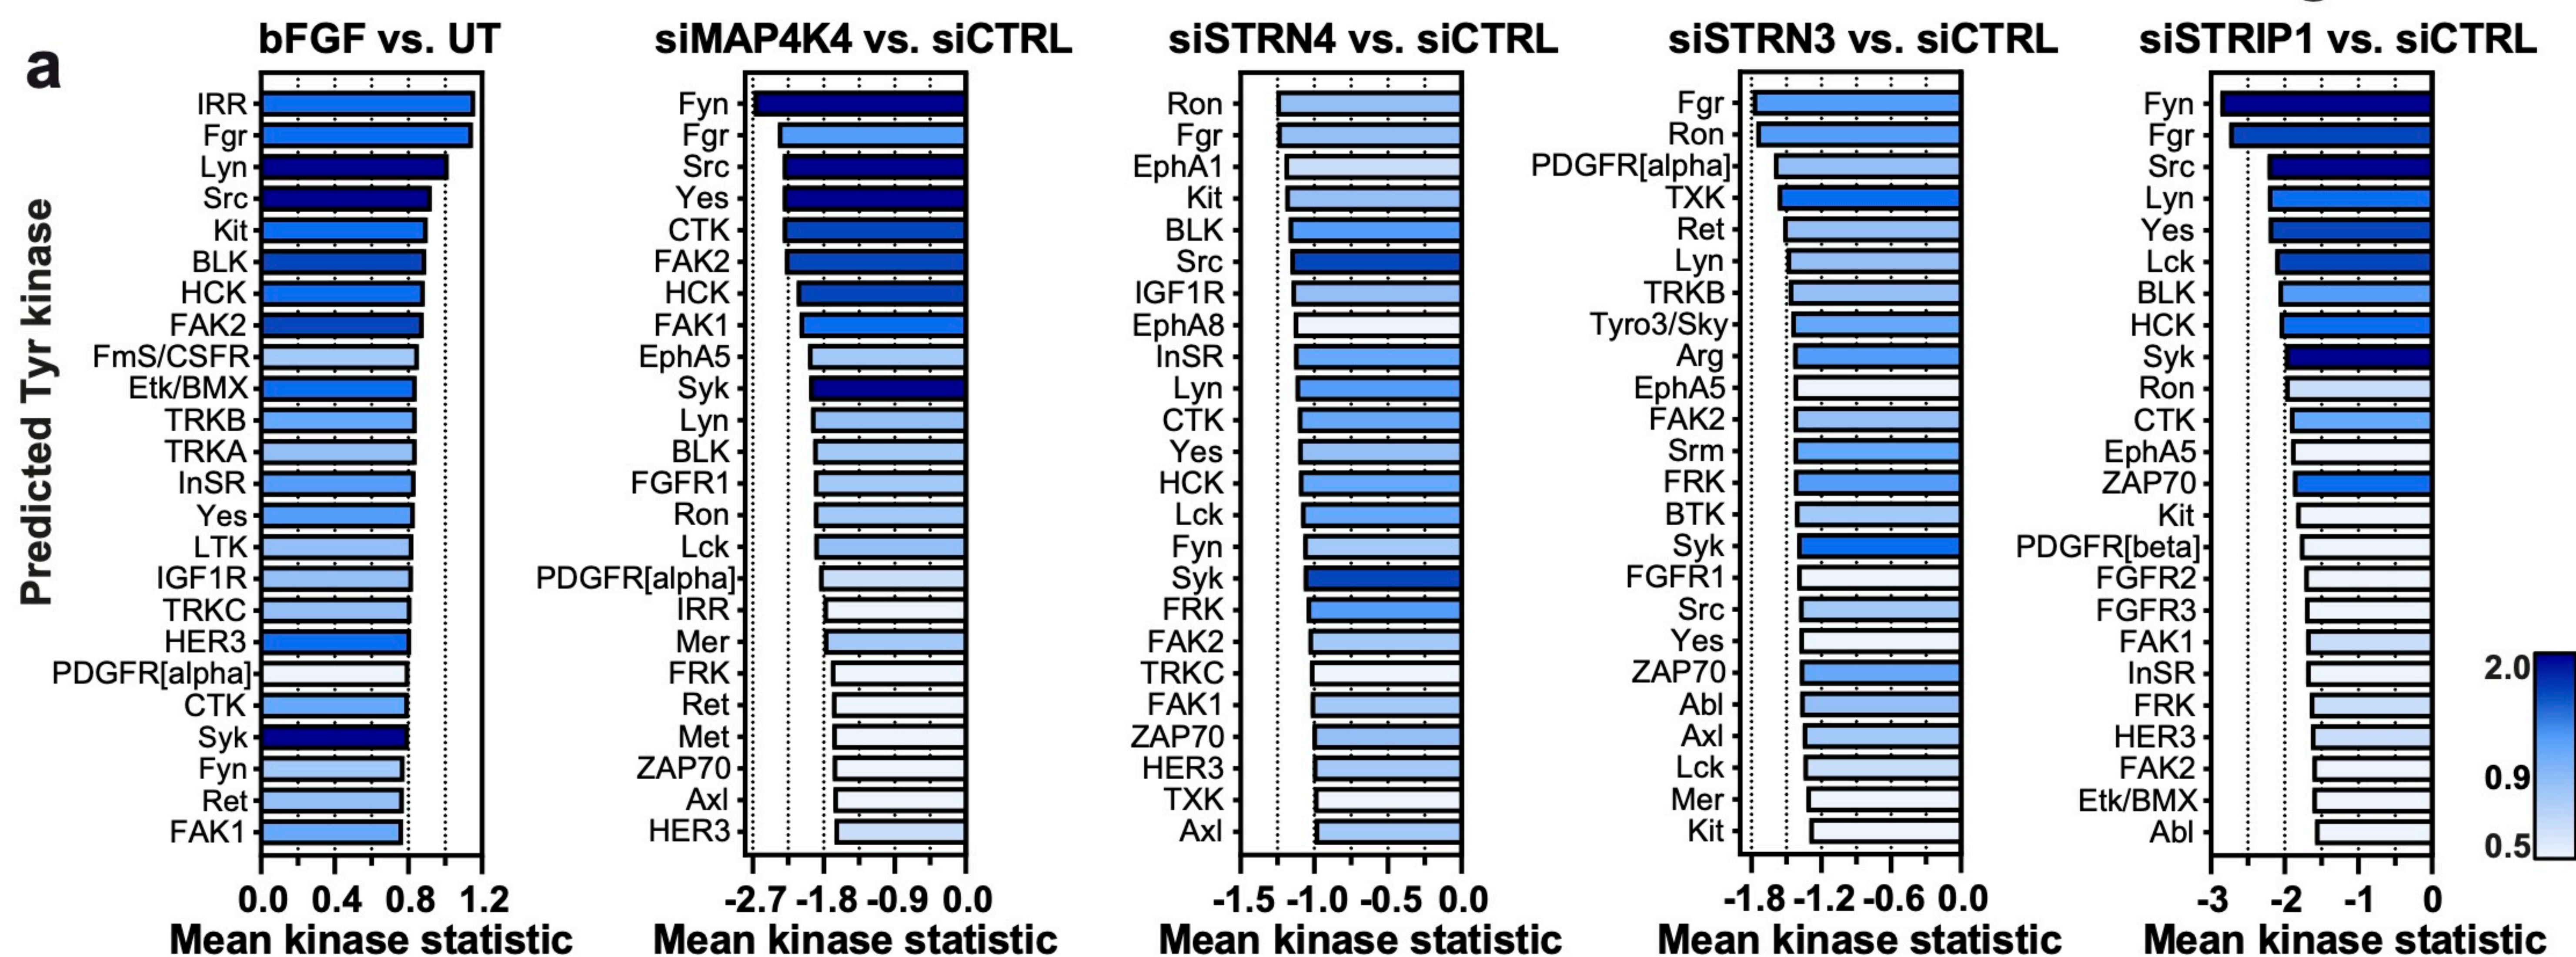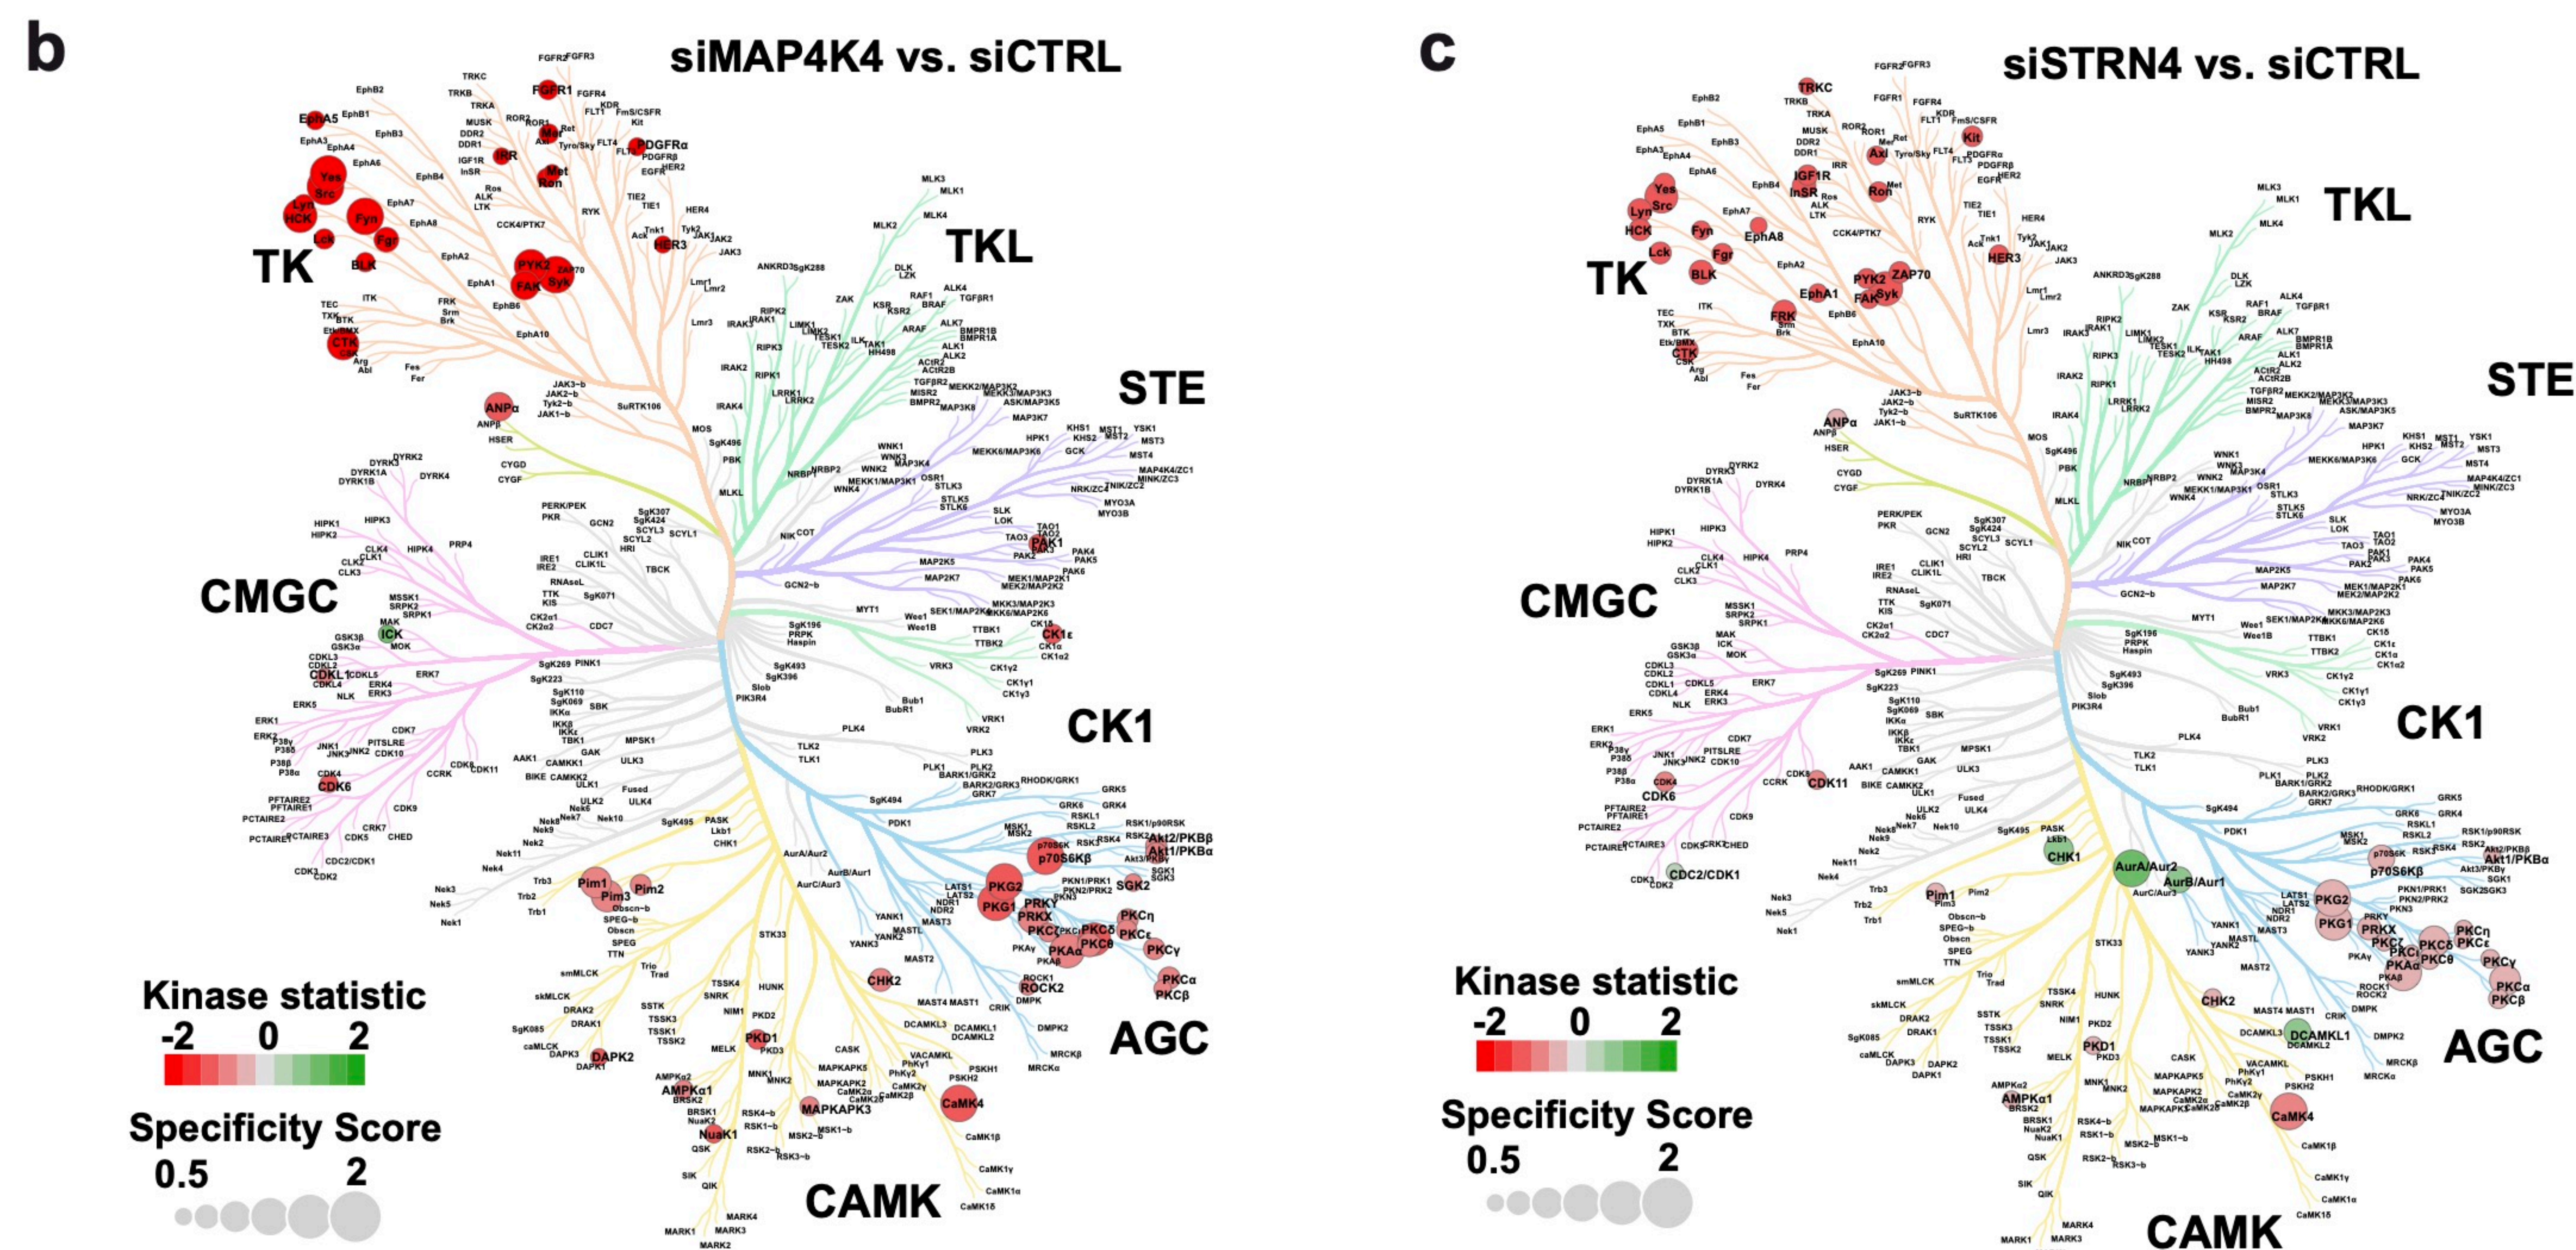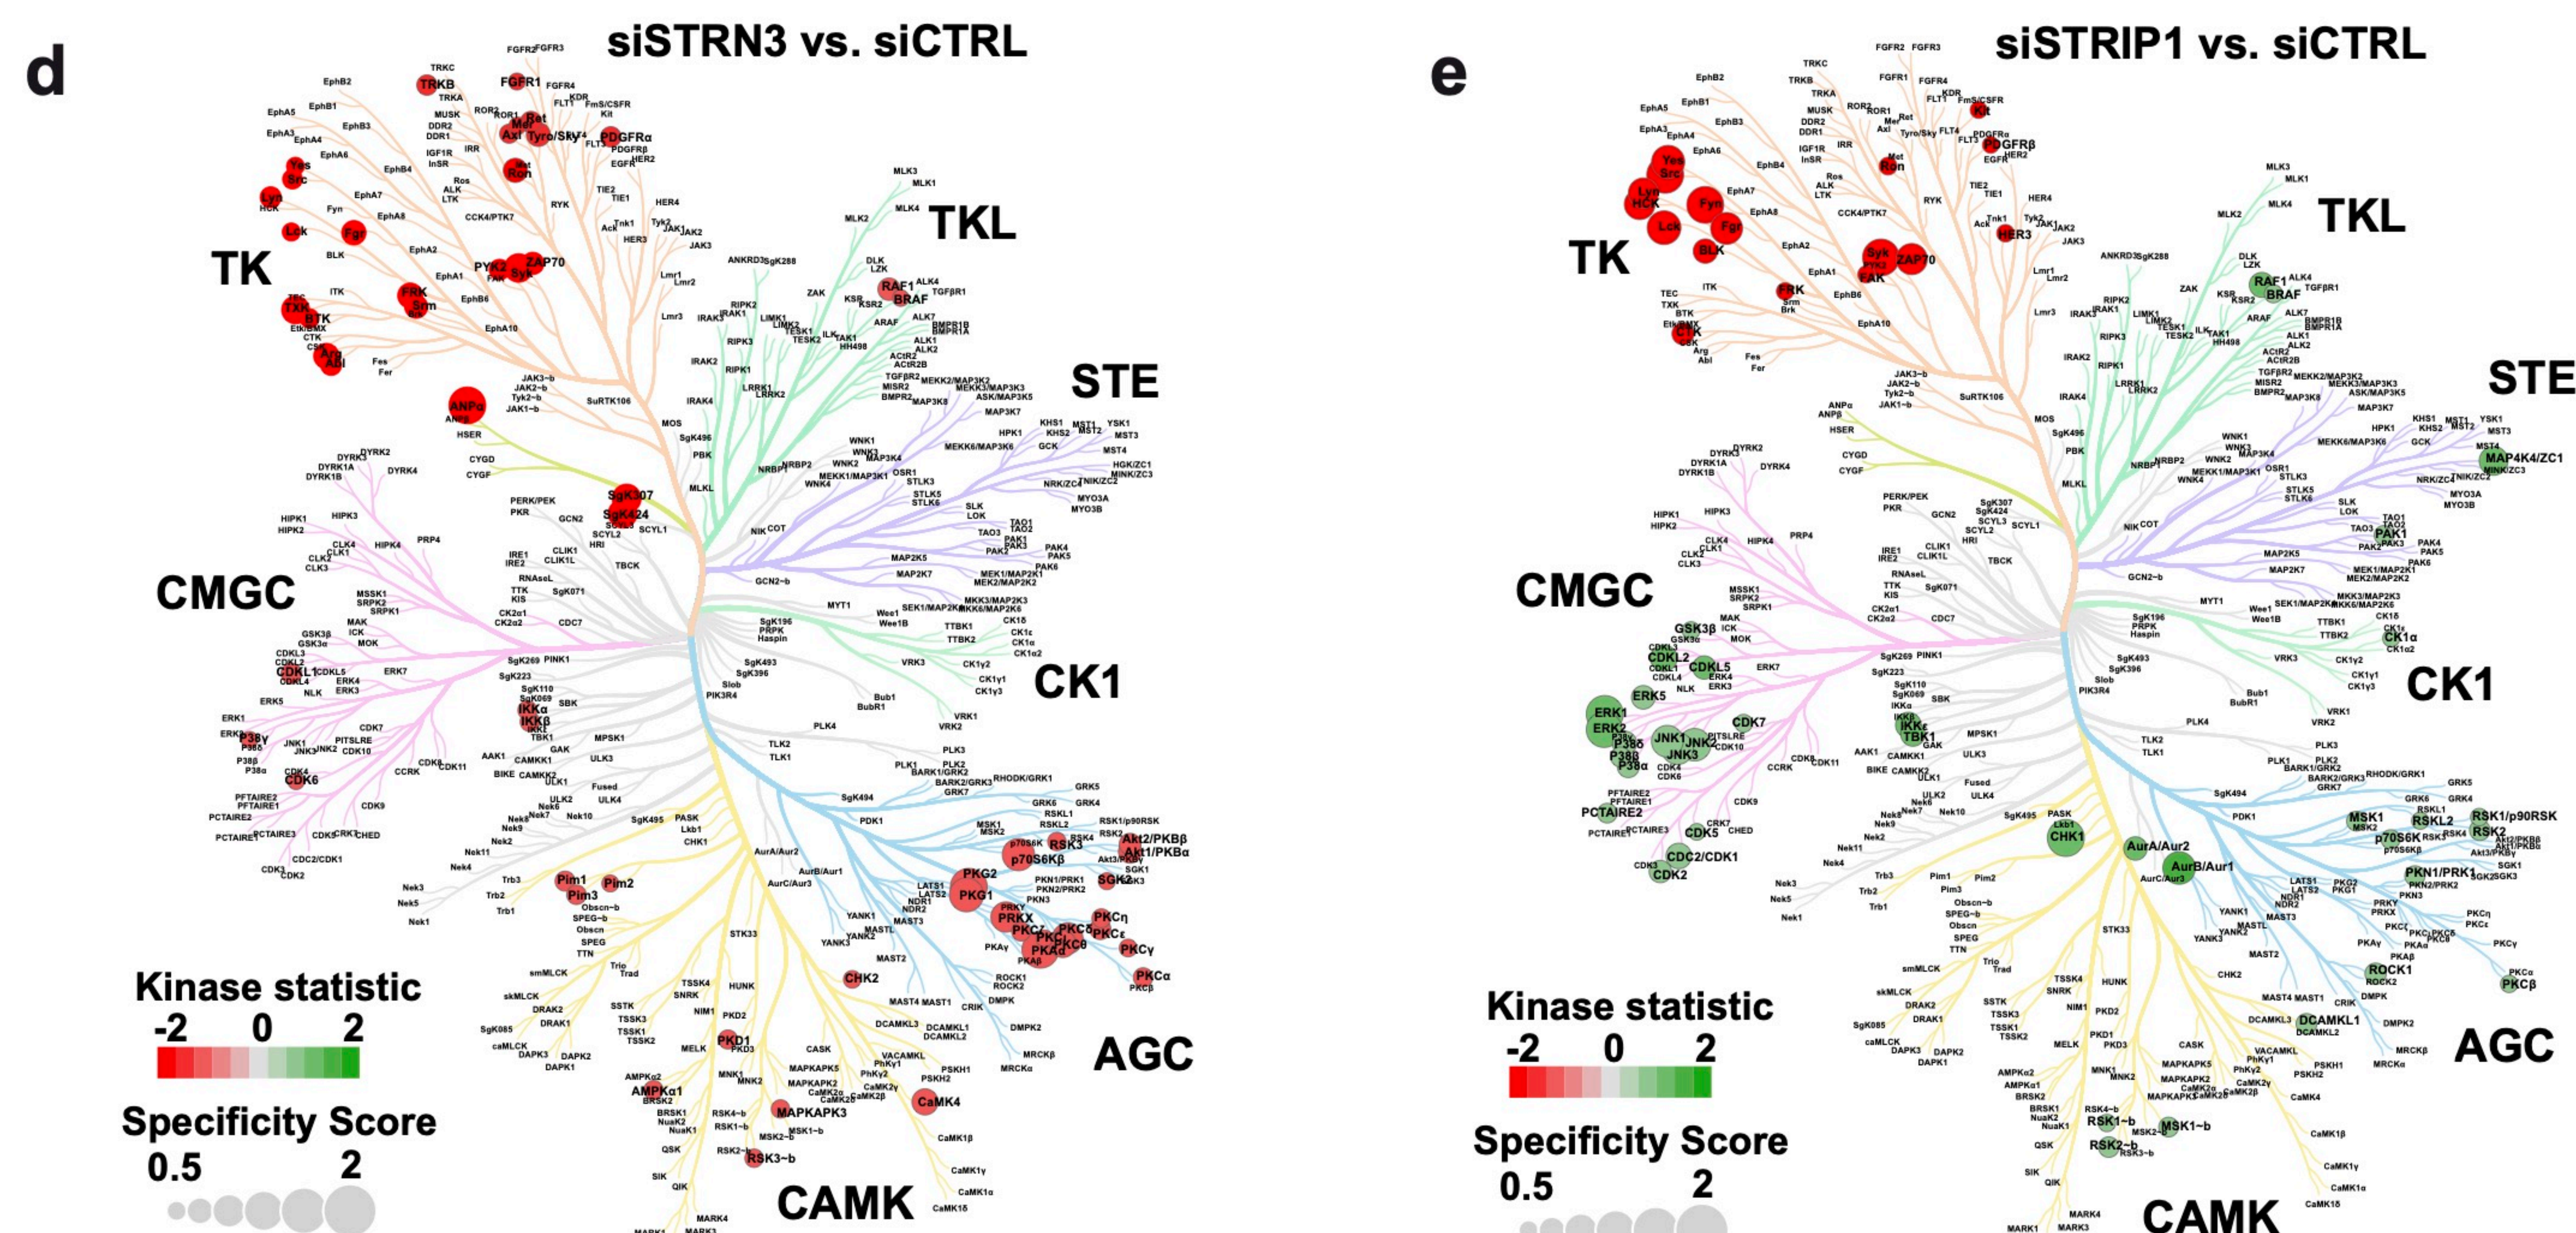



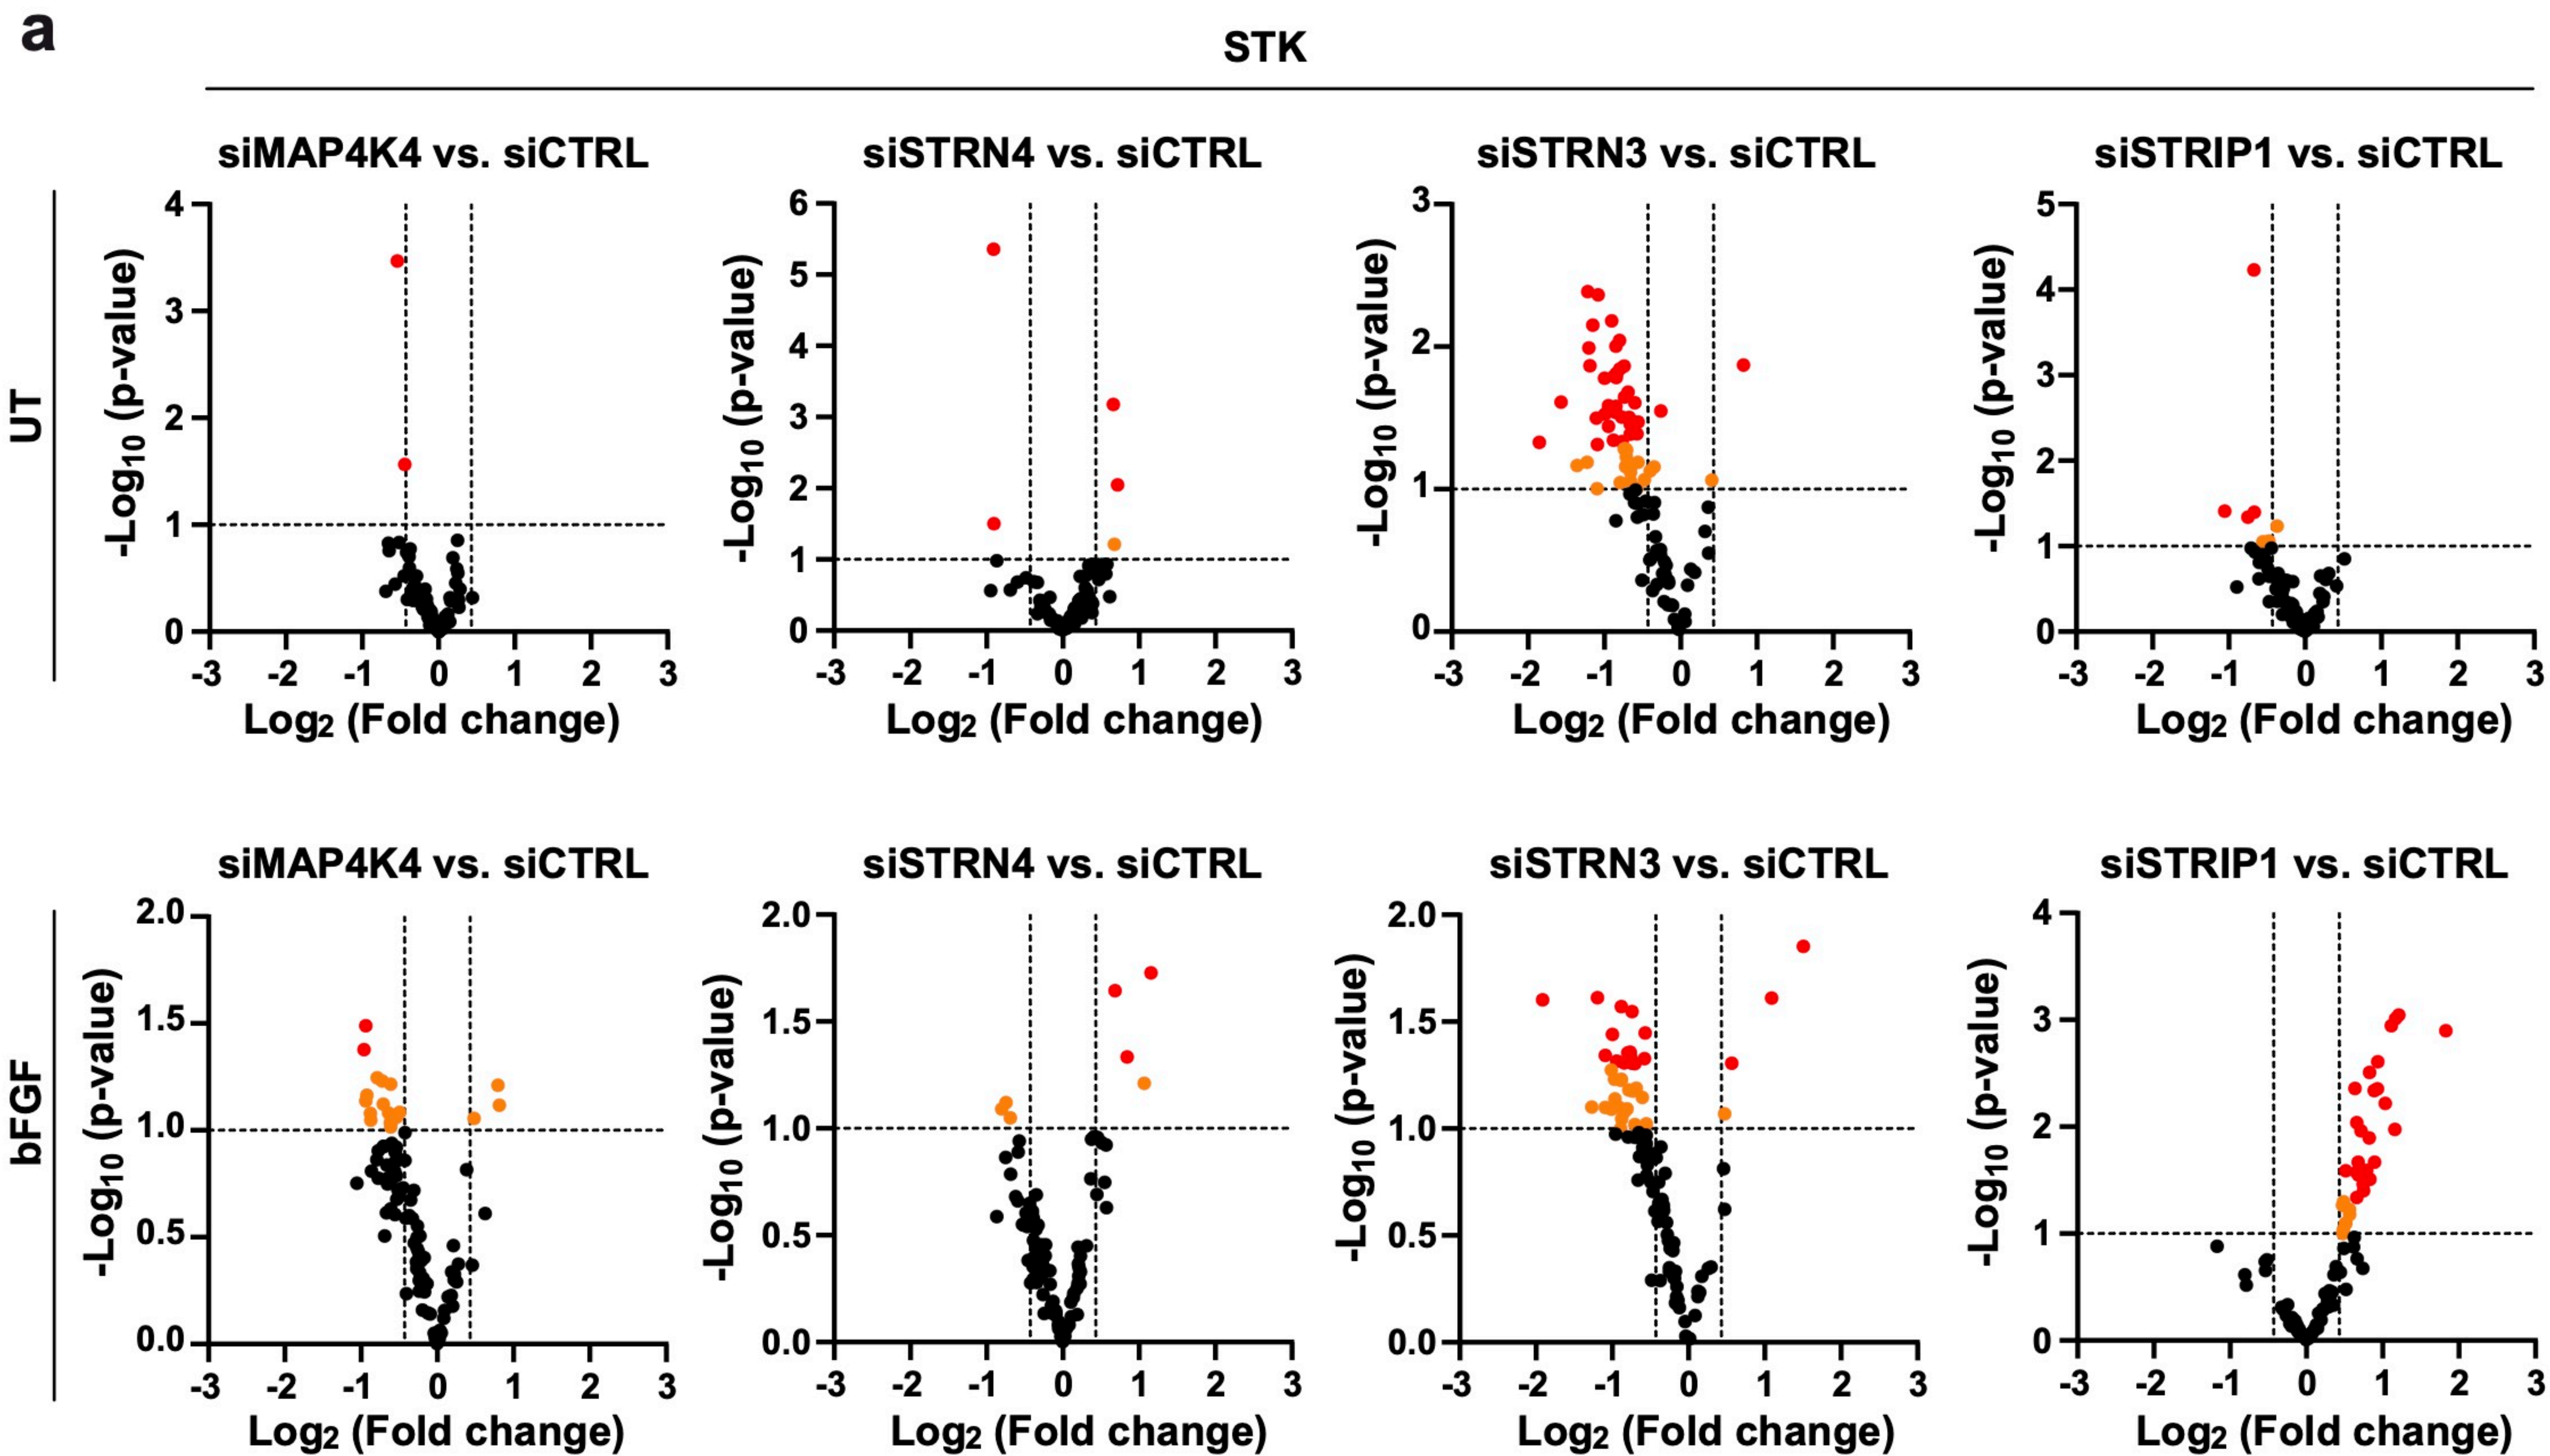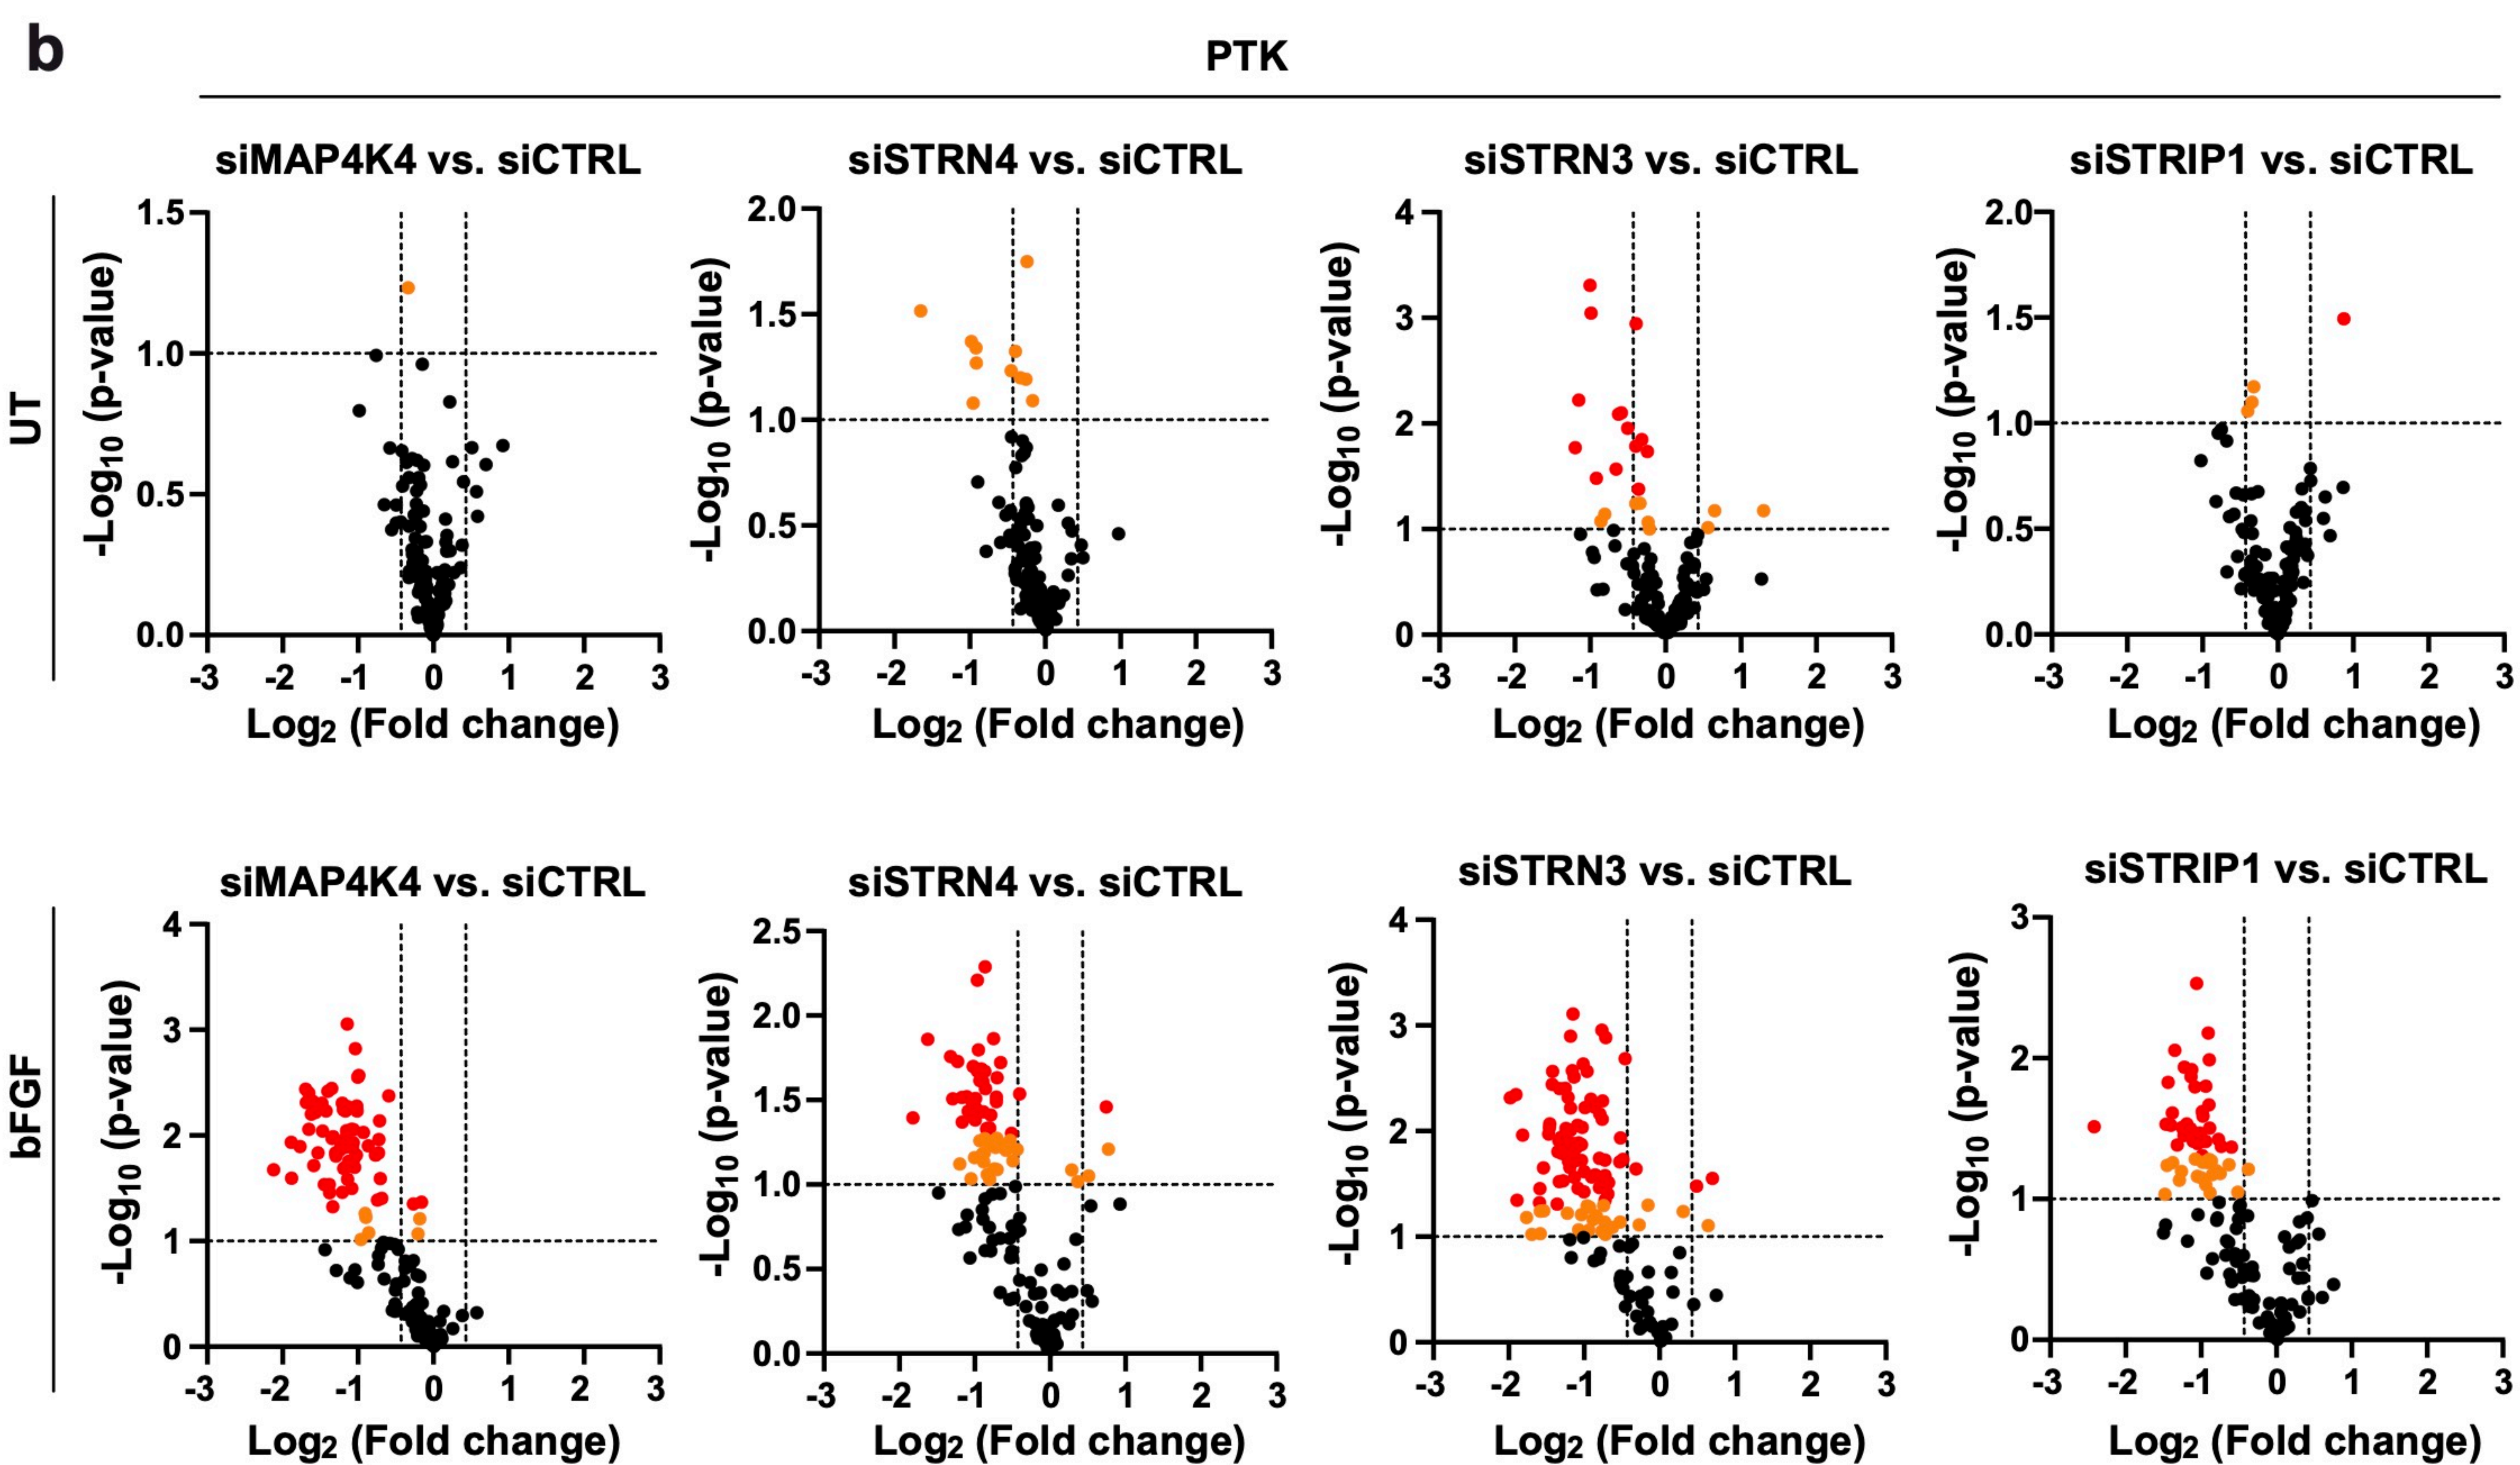

Supplement: Supplementary file [file media-1.pdf]
